# Supplementary material for: Direct reductive amination of 5-hydroxymethylfurfural with primary/secondary amines via Ru-complex catalyzed hydrogenation
Source: Royal Society of Chemistry journal article supplement (doi:10.1039/c4ra10349a), 2014-01-01

## Electronic Supplementary Information

### Direct reductive amination of 5-hydroxymethylfurfural with primary/secondary amines via Ru-complex catalyzed hydrogenation

Zhanwei Xu, Peifang Yan, Wenjuan Xu, Songyan Jia, Zhi Xia, Benjamin Chung, Z. Conrad Zhang\*

State Key Laboratory of Catalysis, Dalian National Lab for Clean Energy, Dalian Institute of Chemical Physics, Chinese Academy of Sciences, 457 Zhongshan Road, Dalian, China.

#### 1. General Methods

NMR spectra were obtained in CDCl<sub>3</sub> on a 400 MHz instrument and recorded at the following frequencies: proton (<sup>1</sup>H, 400 MHz), carbon (<sup>13</sup>C, 100 MHz). <sup>1</sup>H NMR chemical shifts were reported in ppm using tetramethylsilane (TMS, δ (ppm) = 0.00 ppm) as the internal standard. <sup>13</sup>C NMR spectra were reported in ppm using CDCl<sub>3</sub> as the internal standard. Column chromatography was performed using silica gel and analytical thin-layer chromatography (TLC) was performed on silica gel plates. All the reagents used were of analytical grade, purchased locally and used without any purification unless otherwise specified.

#### 2. Experimental Procedures

To a solution of 5-HMF (63.0 mg, 0.5 mmol) in solvent (1.0 mL) at room temperature was added a catalyst (0.5 mol% to 5-HMF) and amine (0.55 mmol, 1.1 equiv to 5-HMF). A high throughput reactor (Freeslate, USA) was used which was purged with H<sub>2</sub> (173 psi) three times at ambient temperature before heated to the set temperature. The reactors were shaking at a rate of 700 rpm/min until completion of reaction. After removing solvent, the residual in each vial was purified on silica gel column (petroleum ether: ethyl acetate, 5:2) to afford product.

#### 3. Analytical data

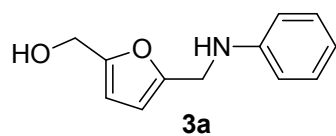

(5-((phenylamino)methyl)furan-2-yl)methanol (3a)

colorless oil, 94.4 mg, 93% yield. <sup>1</sup>H NMR (CDCl<sub>3</sub>, 400 MHz) δ 3.13 (br s, 2H, NH and OH), 4.30 (s, 2H, CH<sub>2</sub>NH), 4.54 (s, 2H, CH<sub>2</sub>OH), 6.18 (d, *J* = 3.1 Hz, 1H, furanH), 6.21 (d, *J* = 3.1 Hz, 1H, furanH), 6.67–6.78 (m, 3H, ArH), 7.18–7.22 (m, 2H, ArH); <sup>13</sup>C NMR (CDCl<sub>3</sub>, 100 MHz) δ 41.6, 57.4, 107.8, 108.6, 113.3, 118.2, 129.3,

147.6, 152.9, 153.5. IR  $\nu_{\max}/\text{cm}^{-1}$  3388, 3052, 2926, 2864, 1602, 1506, 1317, 1011, 795, 750, 692. HRMS (ESI) Calc. for  $\text{C}_{12}\text{H}_{14}\text{NO}_2$   $[\text{M}+\text{H}]^+$ : 204.1019, found: 204.1029.

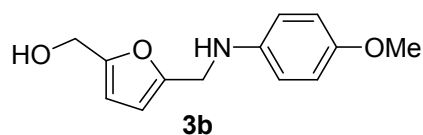

(5-(((4-methoxyphenyl)amino)methyl)furan-2-

yl)methanol (**3b**) yellow oil, 103.8 mg, 89% yield.  $^1\text{H}$  NMR ( $\text{CDCl}_3$ , 400 MHz)  $\delta$  3.27 (br s, 2H, NH and OH), 3.73 (s, 3H, OMe), 4.21 (s, 2H,  $\text{CH}_2\text{NH}$ ), 4.51 (s, 2H,  $\text{CH}_2\text{OH}$ ), 6.14 (d,  $J = 3.1$  Hz, 1H, furanH), 6.17 (d,  $J = 3.1$  Hz, 1H, furanH), 6.61–6.79 (m, 4H, ArH);  $^{13}\text{C}$  NMR ( $\text{CDCl}_3$ , 100 MHz)  $\delta$  42.6, 55.8, 57.3, 107.8, 108.5, 114.85, 114.86, 141.7, 152.6, 153.0, 153.5. IR  $\nu_{\max}/\text{cm}^{-1}$  3370, 2929, 1513, 1459, 1234, 1026, 821, 777. HRMS (ESI) Calc. for  $\text{C}_{13}\text{H}_{16}\text{NO}_3$   $[\text{M}+\text{H}]^+$ : 234.1125, found: 234.1122.

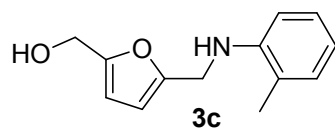

(5-((o-tolylamino)methyl)furan-2-yl)methanol (**3c**)

colorless oil, 85.8 mg, 79% yield.  $^1\text{H}$  NMR ( $\text{CDCl}_3$ , 400 MHz)  $\delta$  1.76 (br s, 1H, OH), 2.16 (s, 3H, Me), 3.86 (br s, 1H, NH), 4.35 (s, 2H,  $\text{CH}_2\text{NH}$ ), 4.58 (s, 2H,  $\text{CH}_2\text{OH}$ ), 6.19 (d,  $J = 3.1$  Hz, 1H, furanH), 6.22 (d,  $J = 3.1$  Hz, 1H, furanH), 6.67–7.13 (m, 4H, ArH);  $^{13}\text{C}$  NMR ( $\text{CDCl}_3$ , 100 MHz)  $\delta$  17.5, 41.6, 57.6, 107.8, 108.7, 110.2, 117.7, 122.4, 127.1, 130.2, 145.6, 153.0, 153.5. IR  $\nu_{\max}/\text{cm}^{-1}$  3402, 3016, 2925, 2857, 1606, 1512, 1011, 793, 748. HRMS (ESI) Calc. for  $\text{C}_{13}\text{H}_{15}\text{NNaO}_2$   $[\text{M}+\text{Na}]^+$ : 240.0995, found: 240.0998.

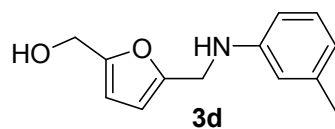

(5-((m-tolylamino)methyl)furan-2-yl)methanol (**3d**)

colorless oil, 98.0 mg, 90% yield.  $^1\text{H}$  NMR ( $\text{CDCl}_3$ , 400 MHz)  $\delta$  1.92 (br s, 1H, OH), 2.27 (s, 3H, Me), 3.95 (br s, 1H, NH), 4.28 (s, 2H,  $\text{CH}_2\text{NH}$ ), 4.55 (s, 2H,  $\text{CH}_2\text{OH}$ ), 6.17 (d,  $J = 3.1$  Hz, 1H, furanH), 6.20 (d,  $J = 3.1$  Hz, 1H, furanH), 6.47–6.49 (m, 2H, ArH), 6.57 (d,  $J = 7.3$  Hz, 1H, ArH), 7.05–7.09 (m, 1H, ArH);  $^{13}\text{C}$  NMR ( $\text{CDCl}_3$ , 100 MHz)  $\delta$  21.6, 41.6, 57.5, 107.8, 108.7, 110.3, 114.1, 119.1, 129.1, 139.1, 147.6, 153.0, 153.4. IR  $\nu_{\max}/\text{cm}^{-1}$  3380, 3024, 2920, 2862, 1606, 1591, 1491, 1177, 1011, 771, 692. HRMS (ESI) Calc. for  $\text{C}_{13}\text{H}_{16}\text{NO}_2$   $[\text{M}+\text{H}]^+$ : 218.1176, found: 218.1173.

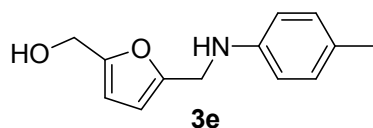

(5-((p-tolylamino)methyl)furan-2-yl)methanol (3e)

yellow solid, mp 53 °C, 99.2 mg, 91% yield. <sup>1</sup>H NMR (CDCl<sub>3</sub>, 400 MHz) δ 2.23 (s, 3H, Me), 4.26 (s, 2H, CH<sub>2</sub>NH), 4.54 (s, 2H, CH<sub>2</sub>OH), 6.15 (d, *J* = 3.0 Hz, 1H, furanH), 6.19 (d, *J* = 3.0 Hz, 1H, furanH), 6.59 (d, *J* = 8.4 Hz, 2H, ArH), 6.99 (d, *J* = 8.4 Hz, 2H, ArH); <sup>13</sup>C NMR (CDCl<sub>3</sub>, 100 MHz) δ 20.4, 41.9, 57.5, 107.8, 108.7, 113.5, 127.4, 129.8, 145.3, 153.1, 153.4. IR ν<sub>max</sub>/cm<sup>-1</sup> 3369, 3019, 2920, 2864, 1617, 1520, 1252, 1011, 806. HRMS (ESI) Calc. for C<sub>13</sub>H<sub>16</sub>NO<sub>2</sub> [M+H]<sup>+</sup>: 218.1176, found: 218.1168.

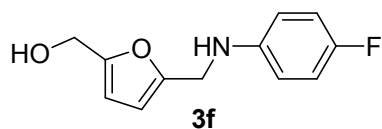

(5-(((4-fluorophenyl)amino)methyl)furan-2-yl)methanol

(3f) colorless oil, 104.0 mg, 94% yield. <sup>1</sup>H NMR (CDCl<sub>3</sub>, 400 MHz) δ 3.11 (br s, 2H, OH and NH), 4.23 (s, 2H, CH<sub>2</sub>NH), 4.53 (s, 2H, CH<sub>2</sub>OH), 6.16 (d, *J* = 3.1 Hz, 1H, furanH), 6.19 (d, *J* = 3.1 Hz, 1H, furanH), 6.57–6.62 (m, 2H, ArH), 6.85–6.92 (m, 2H, ArH); <sup>13</sup>C NMR (CDCl<sub>3</sub>, 100 MHz) δ 42.2, 57.4, 107.9, 108.6, 114.2 (d, *J* = 7.4 Hz), 115.7 (d, *J* = 22.2 Hz), 143.9 (d, *J* = 1.9 Hz), 152.6, 153.5, 156.2 (d, *J* = 234.2 Hz). IR ν<sub>max</sub>/cm<sup>-1</sup> 3353, 2929, 2866, 1511, 1220, 1011, 822, 797. HRMS (ESI) Calc. for C<sub>12</sub>H<sub>12</sub>FNNaO<sub>2</sub> [M+Na]<sup>+</sup>: 244.0744, found: 244.0750.

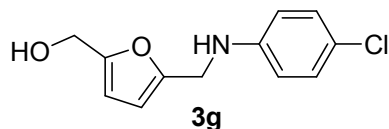

(5-(((4-chlorophenyl)amino)methyl)furan-2-

yl)methanol (3g) colorless oil, 113.0 mg, 95% yield. <sup>1</sup>H NMR (CDCl<sub>3</sub>, 400 MHz) δ 3.11 (br s, 2H, OH and NH), 4.26 (s, 2H, CH<sub>2</sub>NH), 4.55 (s, 2H, CH<sub>2</sub>OH), 6.16 (d, *J* = 3.1 Hz, 1H, furanH), 6.21 (d, *J* = 3.1 Hz, 1H, furanH), 6.56–6.61 (m, 2H, ArH), 7.08–7.14 (m, 2H, ArH); <sup>13</sup>C NMR (CDCl<sub>3</sub>, 100 MHz) δ 41.6, 57.5, 108.0, 108.7, 114.3, 122.7, 129.1, 146.1, 152.4, 153.6. IR ν<sub>max</sub>/cm<sup>-1</sup> 3351, 2928, 2865, 1600, 1499, 1009, 816, 795. HRMS (ESI) Calc. for C<sub>12</sub>H<sub>12</sub>ClNNaO<sub>2</sub> [M+Na]<sup>+</sup>: 260.0449, found: 260.0453.

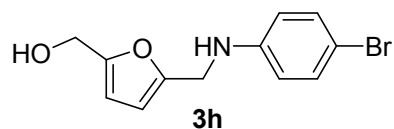

(5-(((4-bromophenyl)amino)methyl)furan-2-

yl)methanol (**3h**) yellow solid, mp 83 °C, 133.7 mg, 95% yield. <sup>1</sup>H NMR (CDCl<sub>3</sub>, 400 MHz) δ 1.85 (br s, 1H, OH), 4.07 (br s, 1H, NH), 4.26 (s, 2H, CH<sub>2</sub>NH), 4.56 (s, 2H, CH<sub>2</sub>OH), 6.16 (d, *J* = 3.0 Hz, 1H, furanH), 6.20 (d, *J* = 3.0 Hz, 1H, furanH), 6.15–7.26 (m, 4H, ArH); <sup>13</sup>C NMR (CDCl<sub>3</sub>, 100 MHz) δ 41.5, 57.5, 108.0, 108.7, 109.7, 114.8, 132.0, 146.5, 152.3, 153.6. IR ν<sub>max</sub>/cm<sup>-1</sup> 3399, 2927, 2865, 1594, 1497, 1316, 1010, 813. HRMS (ESI) Calc. for C<sub>12</sub>H<sub>12</sub>BrNNaO<sub>2</sub> [M+Na]<sup>+</sup>: 303.9944, found: 303.9953.

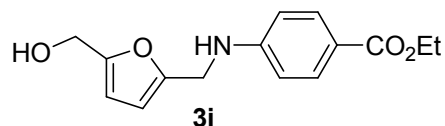

ethyl 4-(((5-(hydroxymethyl)furan-2-yl)methyl)amino)benzoate (**3i**) light yellow solid, mp 133 °C, 95.0 mg, 69% yield. <sup>1</sup>H NMR (CDCl<sub>3</sub>, 400 MHz) δ 1.37 (t, *J* = 7.1 Hz, 3H, OCH<sub>2</sub>CH<sub>3</sub>), 4.30–4.35 (m, 4H), 4.58 (s, 2H, CH<sub>2</sub>OH), 6.19 (d, *J* = 3.0 Hz, 1H, furanH), 6.22 (d, *J* = 3.0 Hz, 1H, furanH), 6.63 (d, *J* = 8.8 Hz, 2H, ArH), 7.88 (d, *J* = 8.8 Hz, 2H, ArH); <sup>13</sup>C NMR (CDCl<sub>3</sub>, 100 MHz) δ 14.4, 40.9, 57.4, 60.3, 108.2, 108.6, 111.9, 131.5, 151.2, 151.8, 153.8, 168.9. IR ν<sub>max</sub>/cm<sup>-1</sup> 3405, 2927, 2865, 1680, 1595, 1495, 1314, 1010, 815. HRMS (ESI) Calc. for C<sub>15</sub>H<sub>17</sub>NNaO<sub>4</sub> [M+Na]<sup>+</sup>: 298.1055, found: 298.1061.

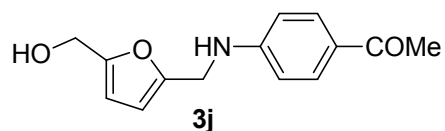

1-(4-(((5-(hydroxymethyl)furan-2-

yl)methyl)amino)phenyl)ethanone (**3j**) yellow solid, mp 154 °C, 80.8 mg, 66% yield. <sup>1</sup>H NMR (CDCl<sub>3</sub>, 400 MHz) δ 2.39 (s, 3H, COCH<sub>3</sub>), 4.30–4.35 (m, 4H), 4.30–4.35 (m, 1H), 6.19 (d, *J* = 3.0 Hz, 1H, furanH), 6.23 (d, *J* = 3.0 Hz, 1H, furanH), 6.67 (d, *J* = 8.8 Hz, 2H, ArH), 6.99–7.02 (m, 1H), 7.71 (d, *J* = 8.8 Hz, 2H, ArH); <sup>13</sup>C NMR (CDCl<sub>3</sub>, 100 MHz) δ 26.4, 56.2, 108.0, 108.3, 111.6, 125.8, 130.8, 152.0, 152.9, 155.2, 195.5. IR ν<sub>max</sub>/cm<sup>-1</sup> 3410, 2927, 2864, 1710, 1598, 1494, 1319, 1010, 813. HRMS (ESI) Calc. for C<sub>14</sub>H<sub>16</sub>NO<sub>3</sub> [M+H]<sup>+</sup>: 246.1130, found: 246.1135.

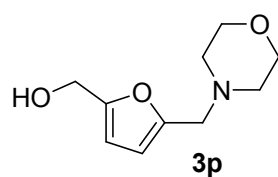

(5-(morpholinomethyl)furan-2-yl)methanol (**3j**) white solid, mp

78 °C, 81.7 mg, 83% yield. <sup>1</sup>H NMR (CDCl<sub>3</sub>, 400 MHz) δ 2.47 (t, *J* = 4.5 Hz, 4H, CH<sub>2</sub>OCH<sub>2</sub>), 2.65 (br s, 1H, OH), 3.51 (s, 2H, CH<sub>2</sub>N(CH<sub>2</sub>CH<sub>2</sub>)<sub>2</sub>), 3.71 (t, *J* = 4.5 Hz, 4H, CH<sub>2</sub>N(CH<sub>2</sub>CH<sub>2</sub>)<sub>2</sub>), 4.57 (s, 2H, CH<sub>2</sub>OH), 6.17 (d, *J* = 3.0 Hz, 1H, furanH), 6.21 (d, *J* = 3.0 Hz, 1H, furanH); <sup>13</sup>C NMR (CDCl<sub>3</sub>, 100 MHz) δ 53.3, 55.4, 57.4, 66.7, 108.2, 110.0, 151.0, 154.2. IR ν<sub>max</sub>/cm<sup>-1</sup> 3397, 2922, 2858, 2816, 1453, 1115, 1006, 791. HRMS (ESI) Calc. for C<sub>10</sub>H<sub>16</sub>NO<sub>3</sub> [M+H]<sup>+</sup>: 198.1125, found: 198.1127.

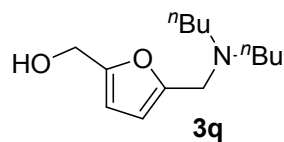

(5-((dibutylamino)methyl)furan-2-yl)methanol (**3k**) colorless oil, 80.5 mg, 67% yield. <sup>1</sup>H NMR (CDCl<sub>3</sub>, 400 MHz) δ 0.90 (t, *J* = 7.3 Hz, 6H, Me), 1.24–1.49 (m, 8H, CH<sub>2</sub>CH<sub>2</sub>), 2.41–2.45 (m, 4H, NCH<sub>2</sub>CH<sub>2</sub>), 2.49 (br s, 1H, OH), 3.61 (s, 2H, CH<sub>2</sub>N), 4.55 (s, 2H, CH<sub>2</sub>OH), 6.10 (d, *J* = 3.1 Hz, 1H, furanH), 6.20 (d, *J* = 3.1 Hz, 1H, furanH); <sup>13</sup>C NMR (CDCl<sub>3</sub>, 100 MHz) δ 14.0, 20.7, 29.0, 50.2, 53.6, 57.5, 108.1, 109.1, 152.8, 153.5. IR ν<sub>max</sub>/cm<sup>-1</sup> 3367, 2957, 2932, 2871, 1459, 1377, 1015, 791. HRMS (ESI) Calc. for C<sub>16</sub>H<sub>26</sub>NO<sub>2</sub> [M+H]<sup>+</sup>: 240.1958, found: 240.1972.

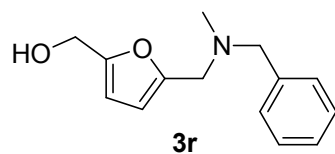

(5-((benzyl(methyl)amino)methyl)furan-2-yl)methanol (**3l**) colorless oil, 100.6 mg, 87% yield. <sup>1</sup>H NMR (CDCl<sub>3</sub>, 400 MHz) δ 2.23 (s, 3H, Me), 3.53 (s, 2H, CH<sub>2</sub>N), 3.55 (s, 2H, CH<sub>2</sub>N), 4.57 (s, 2H, CH<sub>2</sub>OH), 6.15 (d, *J* = 3.1 Hz, 1H, furanH), 6.21 (d, *J* = 3.1 Hz, 1H, furanH), 7.23–7.32 (m, 5H, ArH); <sup>13</sup>C NMR (CDCl<sub>3</sub>, 100 MHz) δ 42.1, 53.5, 57.6, 61.3, 108.3, 109.4, 127.1, 128.3, 129.2, 138.5, 152.4, 153.7. IR ν<sub>max</sub>/cm<sup>-1</sup> 3370, 2925, 2840, 2793, 1453, 1014, 794, 739, 699. HRMS (ESI) Calc. for C<sub>14</sub>H<sub>18</sub>NO<sub>2</sub> [M+H]<sup>+</sup>: 232.1332, found: 232.1347.

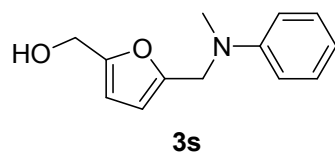

(5-((methyl(phenyl)amino)methyl)furan-2-yl)methanol (**3m**) colorless oil, 85.8 mg, 79% yield. <sup>1</sup>H NMR (CDCl<sub>3</sub>, 400 MHz) δ 1.76 (br s, 1H, OH), 2.98 (s, 3H, Me), 4.43 (s, 2H, CH<sub>2</sub>N), 4.54 (s, 2H, CH<sub>2</sub>OH), 6.06 (d, *J* = 3.1 Hz, 1H, furanH), 6.18 (d, *J* = 3.1 Hz, 1H, furanH), 6.71–7.25 (m, 5H, ArH); <sup>13</sup>C NMR (CDCl<sub>3</sub>, 100 MHz) δ 38.4, 50.1, 57.6, 108.0, 108.6, 113.1, 117.2, 129.1, 149.3, 152.5, 153.4. IR ν<sub>max</sub>/cm<sup>-1</sup> 3369, 2928, 1599, 1506, 1011, 748, 794, 692. HRMS (ESI) Calc. for C<sub>13</sub>H<sub>15</sub>NNaO<sub>2</sub> [M+Na]<sup>+</sup>: 240.0995, found: 240.0984.

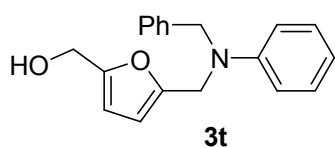

(5-((benzyl(phenyl)amino)methyl)furan-2-yl)methanol (**3n**)

colorless oil, 108.6 mg, 74% yield.  $^1\text{H}$  NMR ( $\text{CDCl}_3$ , 400 MHz)  $\delta$  1.74 (br s, 1H, OH), 4.51 (s, 4H,  $\text{N}(\text{CH}_2)_2$ ), 4.60 (s, 2H,  $\text{CH}_2\text{OH}$ ), 6.10 (d,  $J = 3.1$  Hz, 1H, furanH), 6.17 (d,  $J = 3.1$  Hz, 1H, furanH), 6.70–7.32 (m, 10H, ArH);  $^{13}\text{C}$  NMR ( $\text{CDCl}_3$ , 100 MHz)  $\delta$  47.8, 54.4, 57.6, 108.3, 108.6, 113.0, 117.3, 126.7, 126.9, 128.6, 129.2, 138.7, 148.8, 152.4, 153.5. IR  $\nu_{\text{max}}/\text{cm}^{-1}$  3368, 3060, 2925, 1598, 1505, 1011, 793, 748, 730, 693. HRMS (ESI) Calc. for  $\text{C}_{19}\text{H}_{20}\text{NO}_2$   $[\text{M}+\text{H}]^+$ : 294.1489, found: 294.1493.

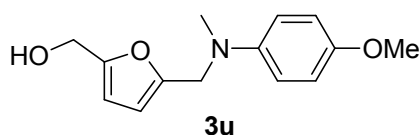

(5-(((4-

methoxyphenyl)(methyl)amino)methyl)furan-2-yl)methanol (**3o**) colorless oil, 89.1 mg, 72% yield.  $^1\text{H}$  NMR ( $\text{CDCl}_3$ , 400 MHz)  $\delta$  2.28 (br s, 1H, OH), 2.87 (s, 3H, NMe), 3.74 (s, 3H, OMe), 4.31 (s, 2H,  $\text{CH}_2\text{N}$ ), 4.52 (s,  $\text{CH}_2\text{OH}$ ), 6.04 (d,  $J = 3.1$  Hz, 1H, furanH), 6.16 (d,  $J = 3.1$  Hz, 1H, furanH), 6.79–6.82 (m, 4H, ArH);  $^{13}\text{C}$  NMR ( $\text{CDCl}_3$ , 100 MHz)  $\delta$  39.2, 51.5, 55.7, 57.5, 108.38, 108.43, 114.7, 115.8, 144.1, 152.3, 152.5, 153.5. IR  $\nu_{\text{max}}/\text{cm}^{-1}$  3393, 2933, 1513, 1244, 1036, 816. HRMS (ESI) Calc. for  $\text{C}_{14}\text{H}_{18}\text{NO}_3$   $[\text{M}+\text{H}]^+$ : 248.1281, found: 248.1287.

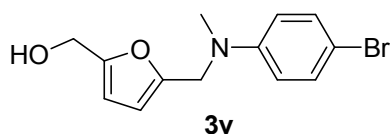

(5-(((4-bromophenyl)(methyl)amino)methyl)furan-2-

yl)methanol (**3p**) colorless oil, 99.3 mg, 67% yield.  $^1\text{H}$  NMR ( $\text{CDCl}_3$ , 400 MHz)  $\delta$  1.84 (br s, 1H, OH), 2.96 (s, 3H, NMe), 4.40 (s, 2H,  $\text{NCH}_2$ ), 4.53 (s, 2H,  $\text{CH}_2\text{OH}$ ), 6.04 (d,  $J = 3.1$  Hz, 1H, furanH), 6.17 (d,  $J = 3.1$  Hz, 1H, furanH), 6.65–7.29 (m, 4H, ArH);  $^{13}\text{C}$  NMR ( $\text{CDCl}_3$ , 100 MHz)  $\delta$  38.5, 50.0, 57.5, 108.1, 108.6, 109.1, 114.6, 131.8, 148.2, 151.9, 153.5. IR  $\nu_{\text{max}}/\text{cm}^{-1}$  3399, 2927, 2865, 1594, 1497, 1316, 1010, 813. HRMS (ESI) Calc. for  $\text{C}_{13}\text{H}_{15}\text{BrNO}_2$   $[\text{M}+\text{H}]^+$ : 296.0281, found: 296.0272.

#### 4. $^1\text{H}$ - and $^{13}\text{C}$ -NMR spectra

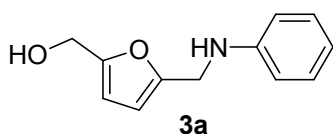

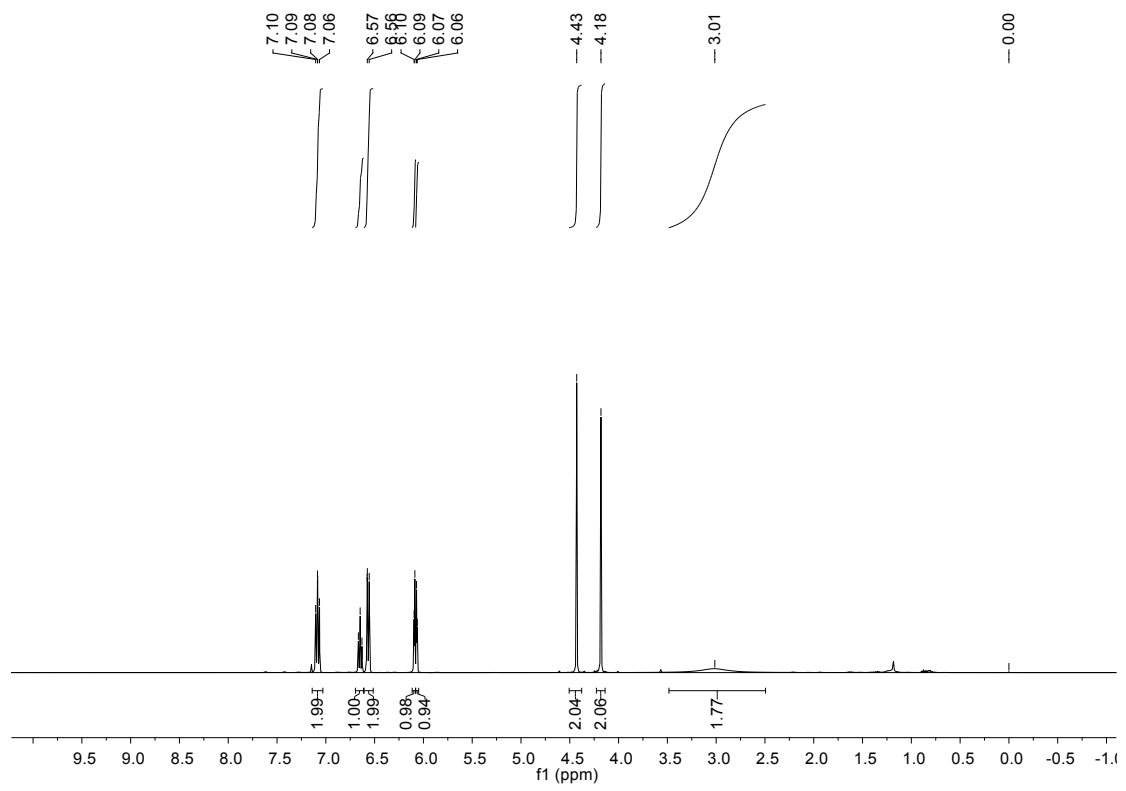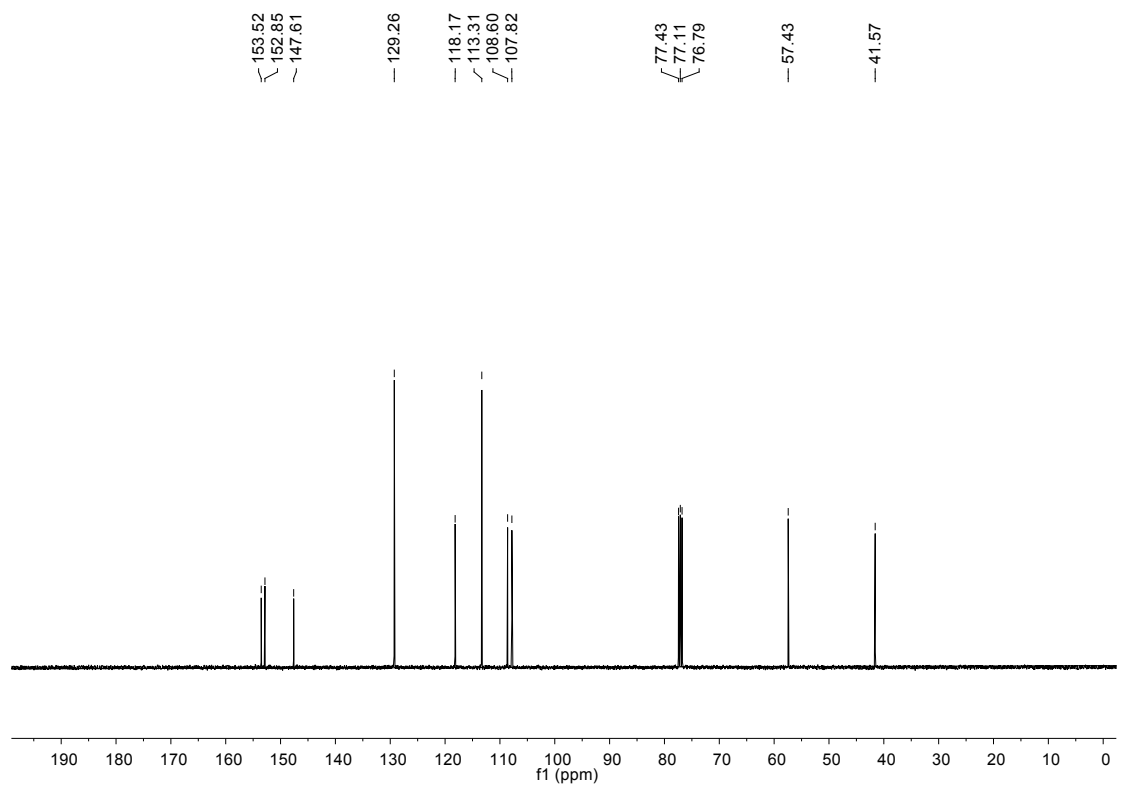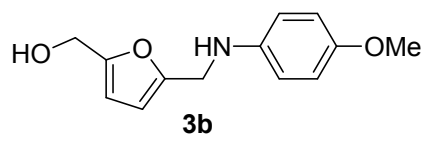

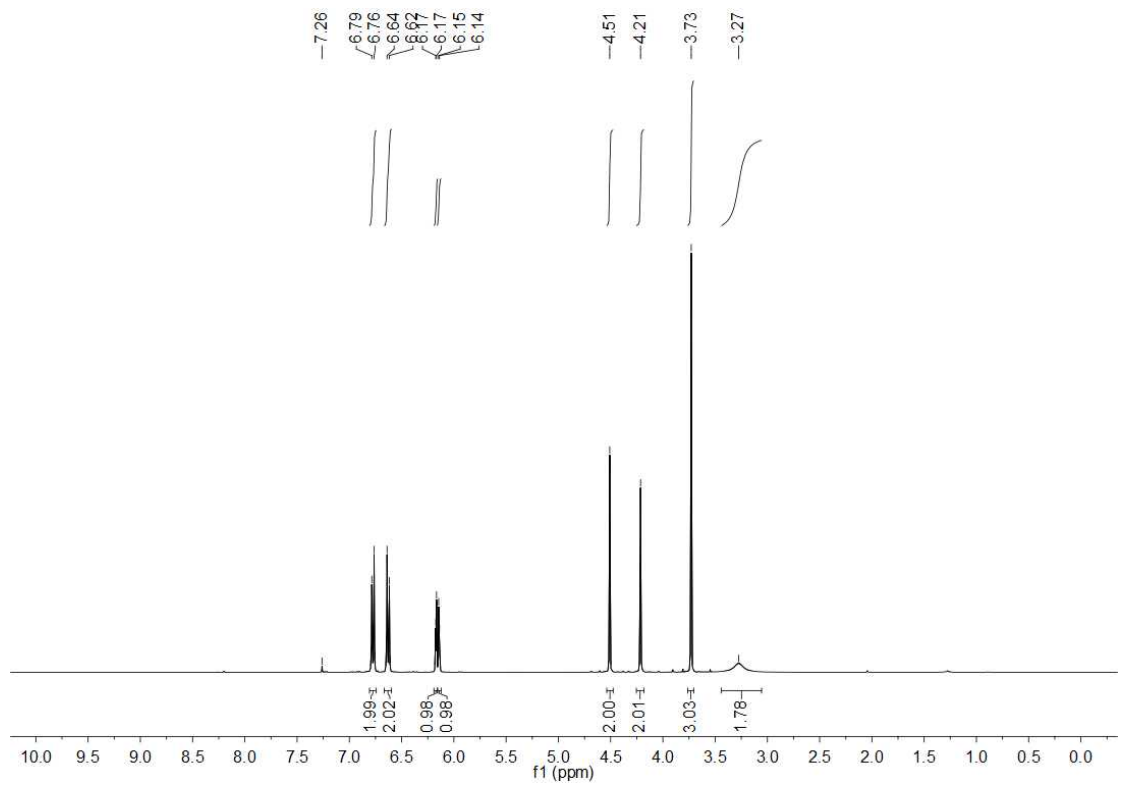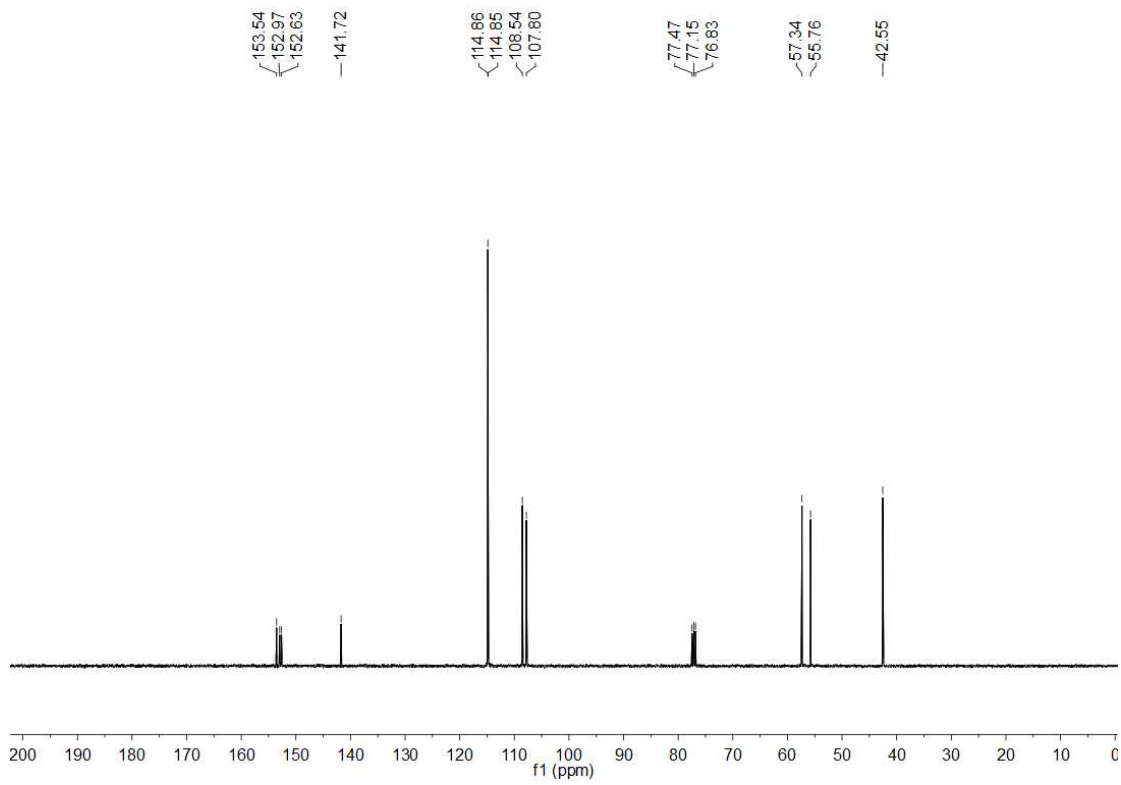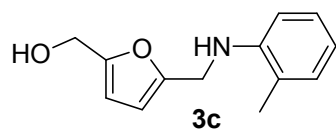



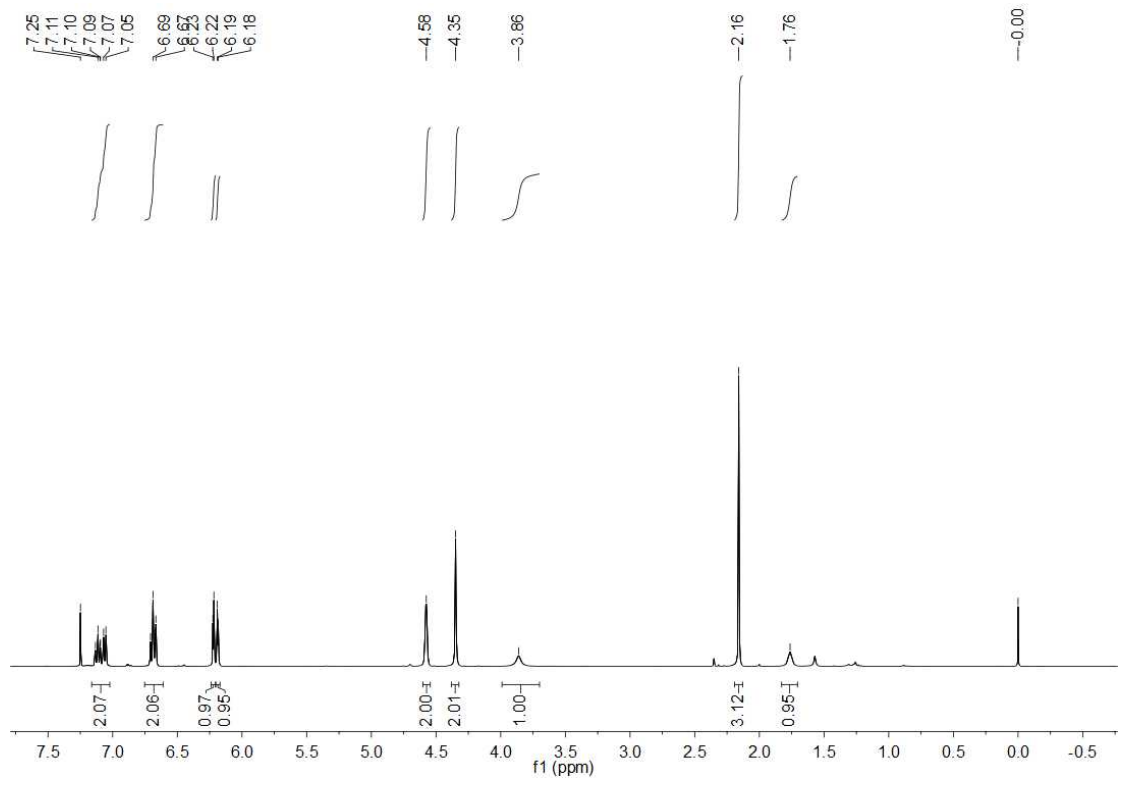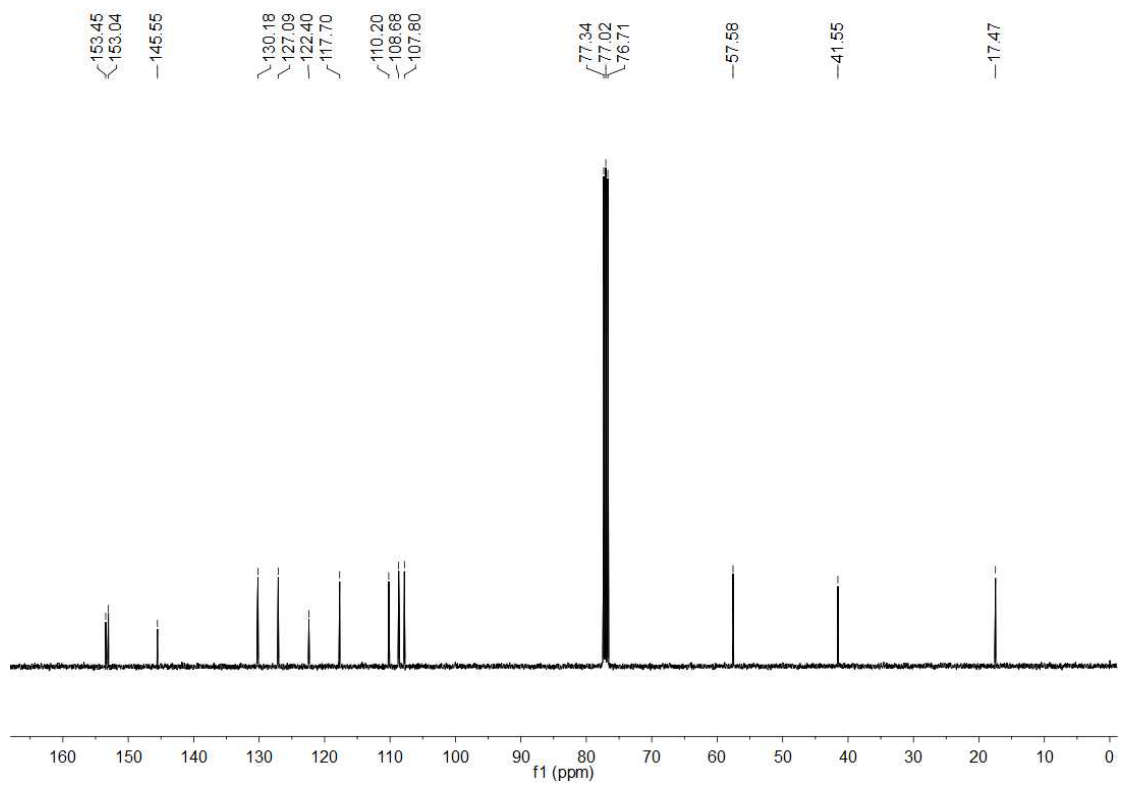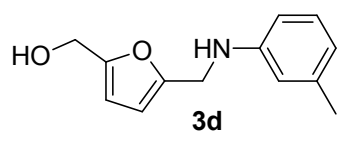

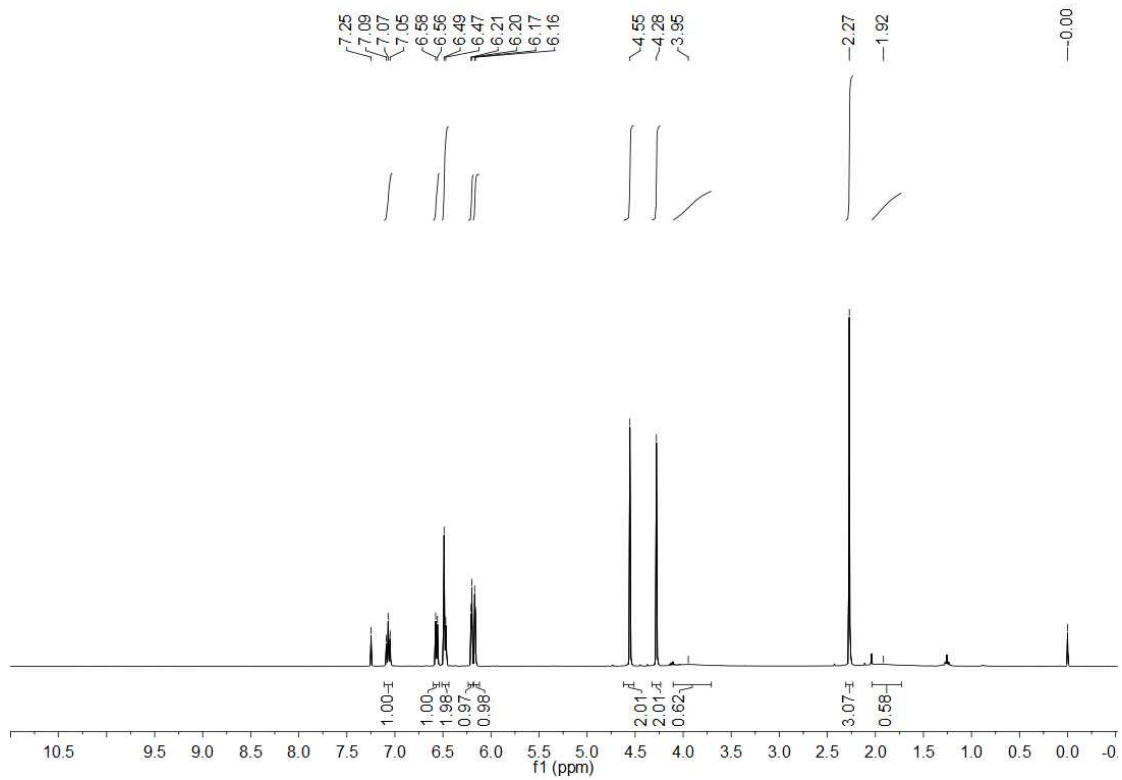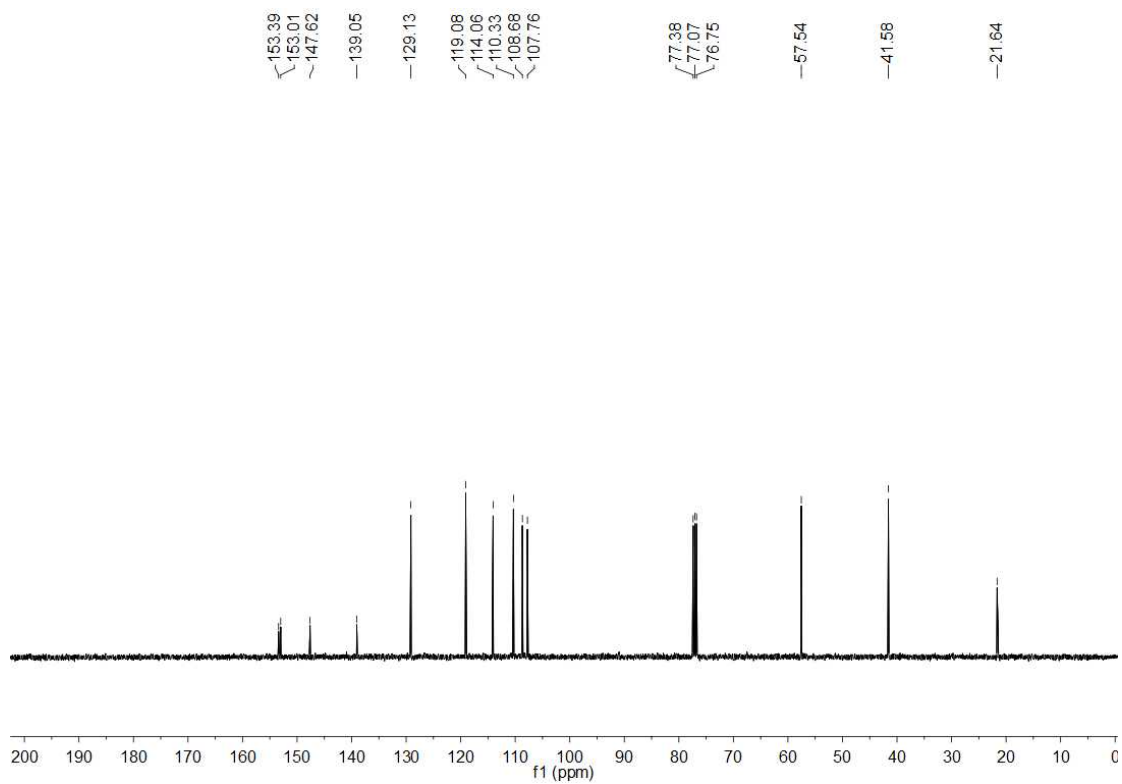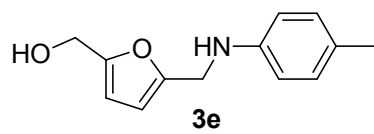

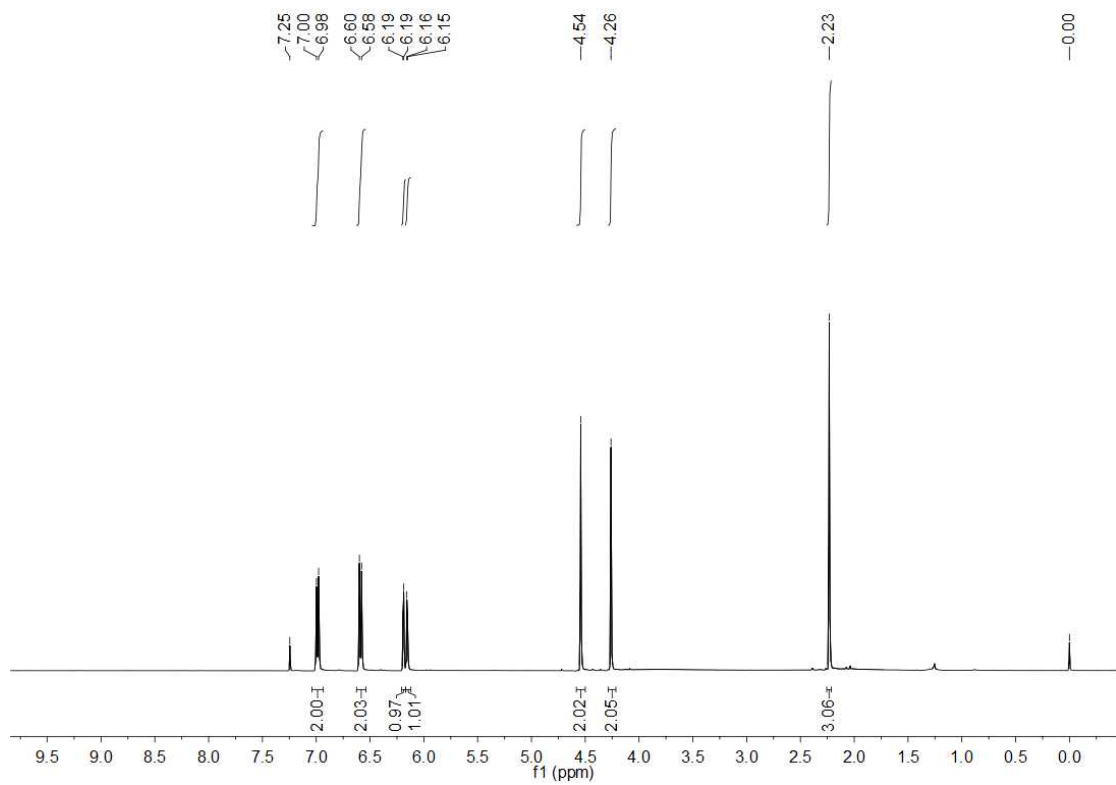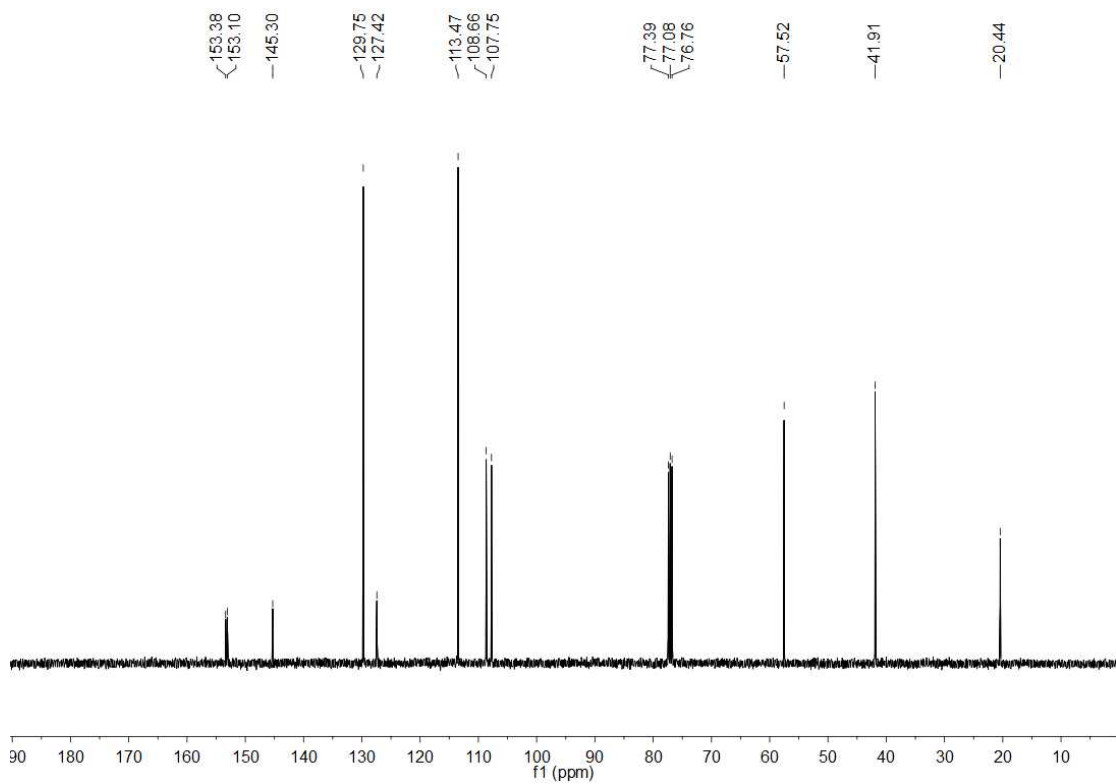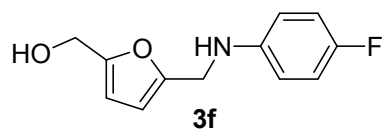

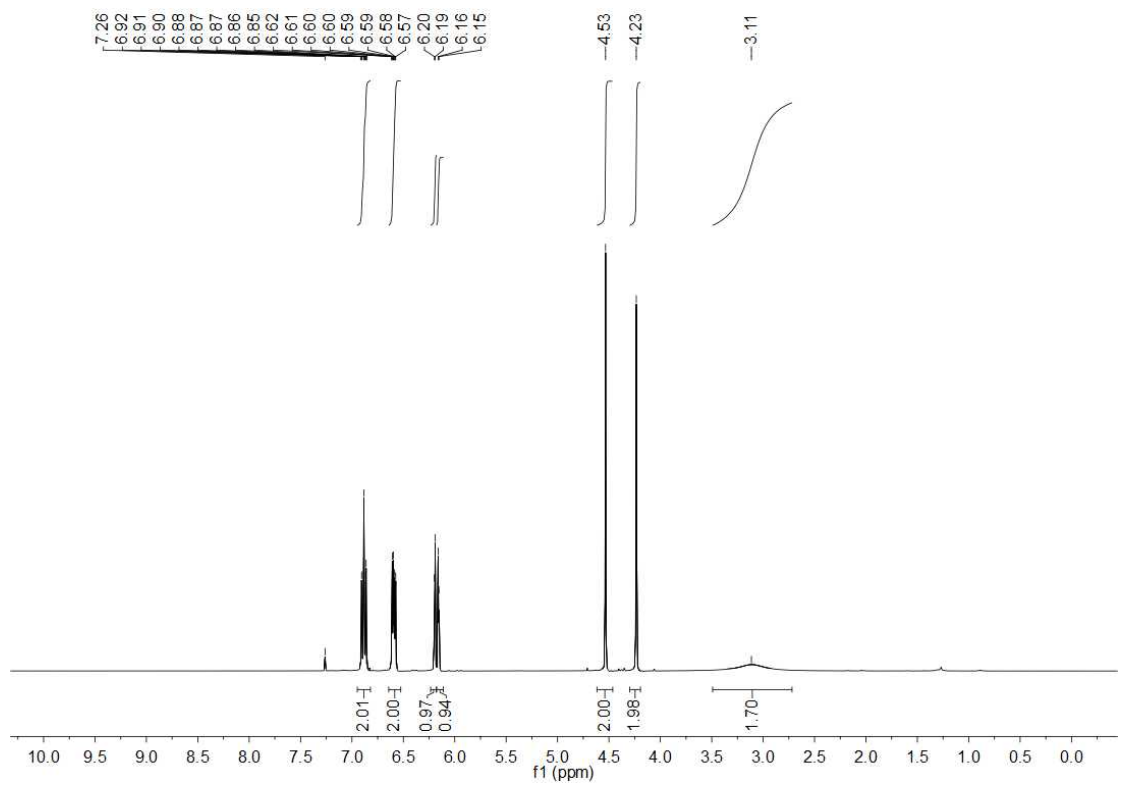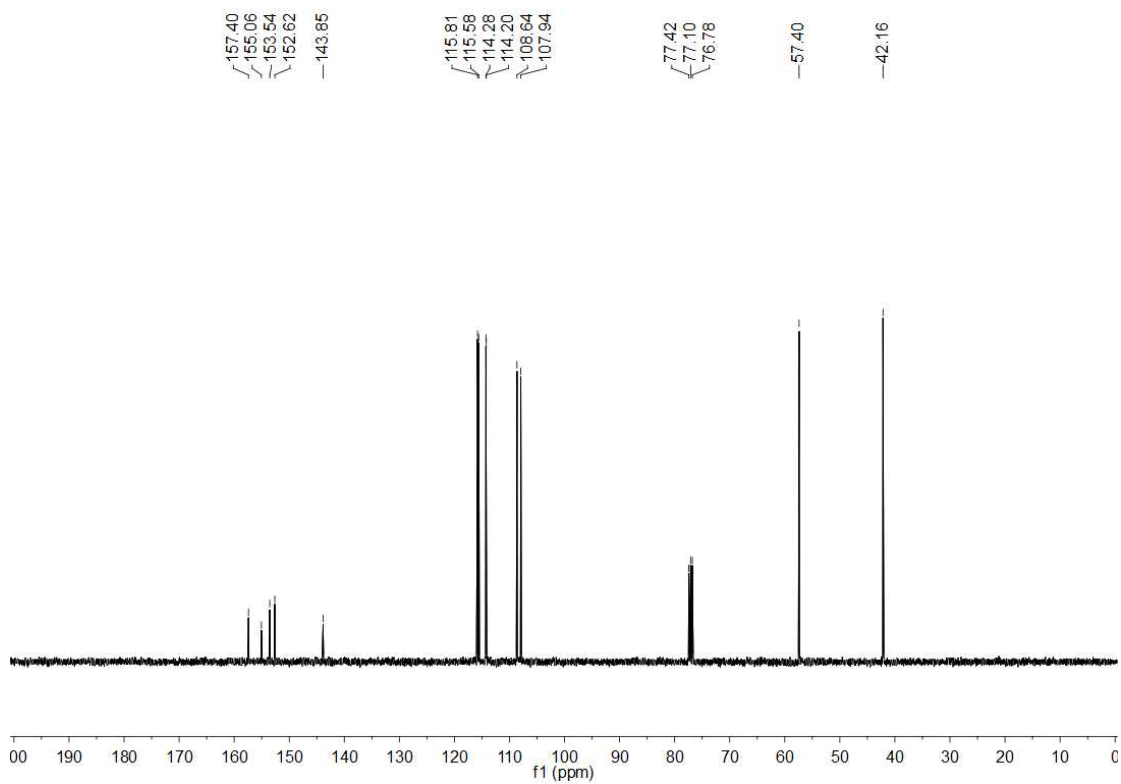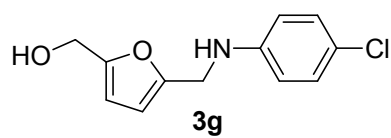

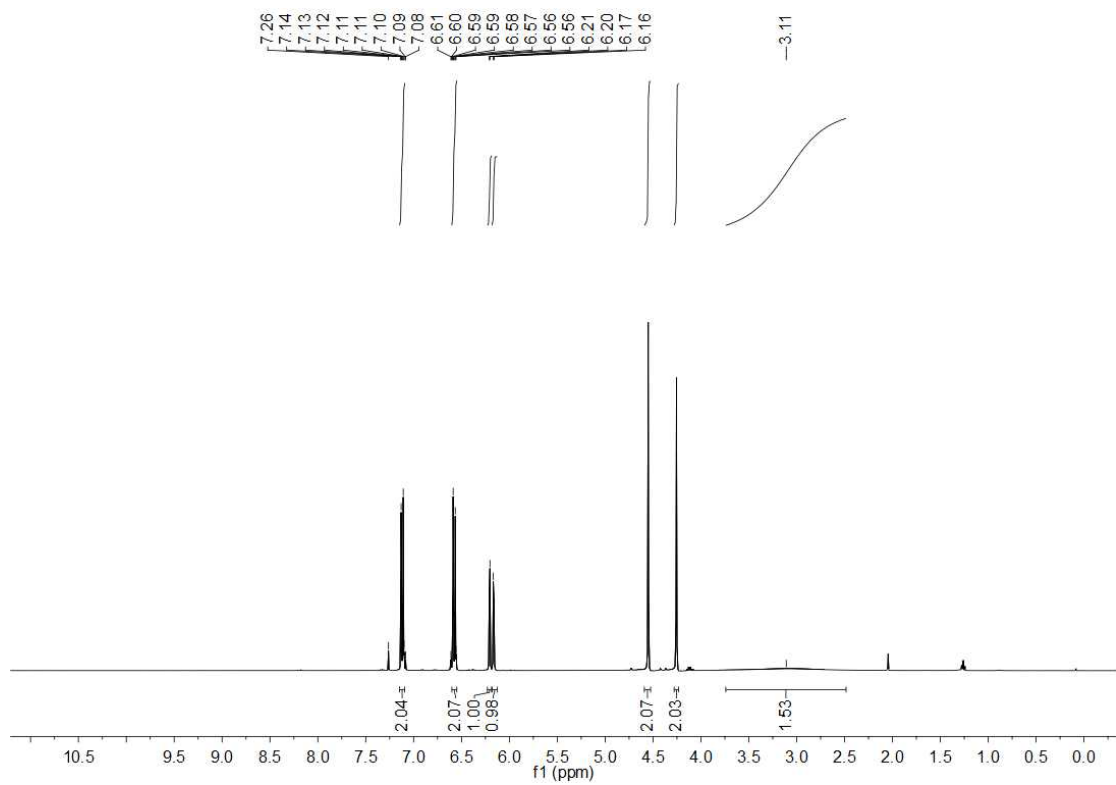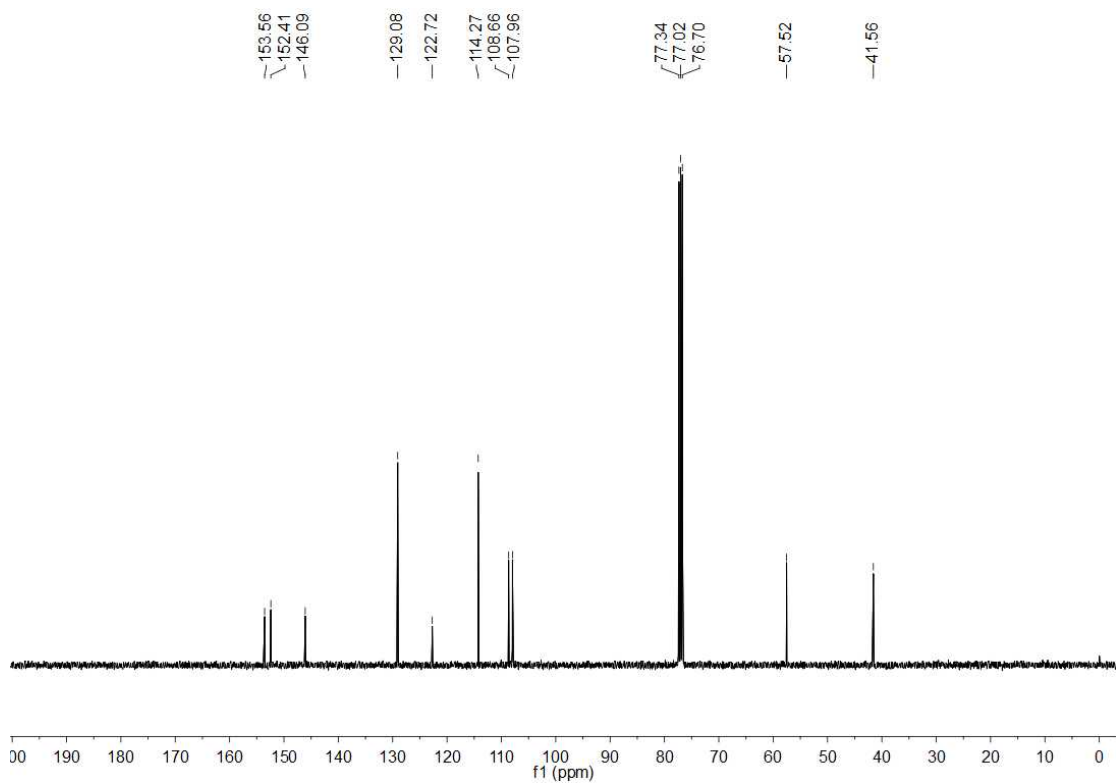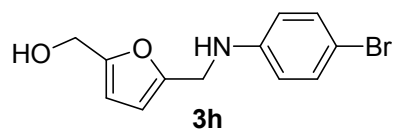

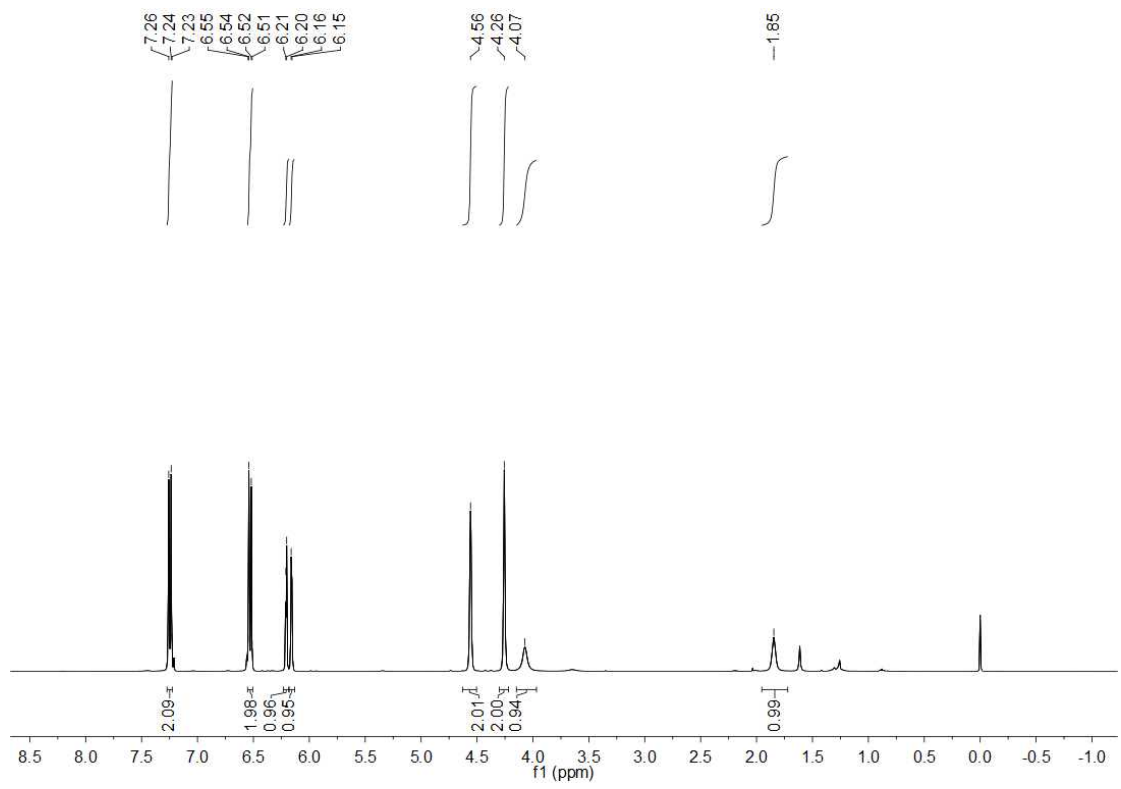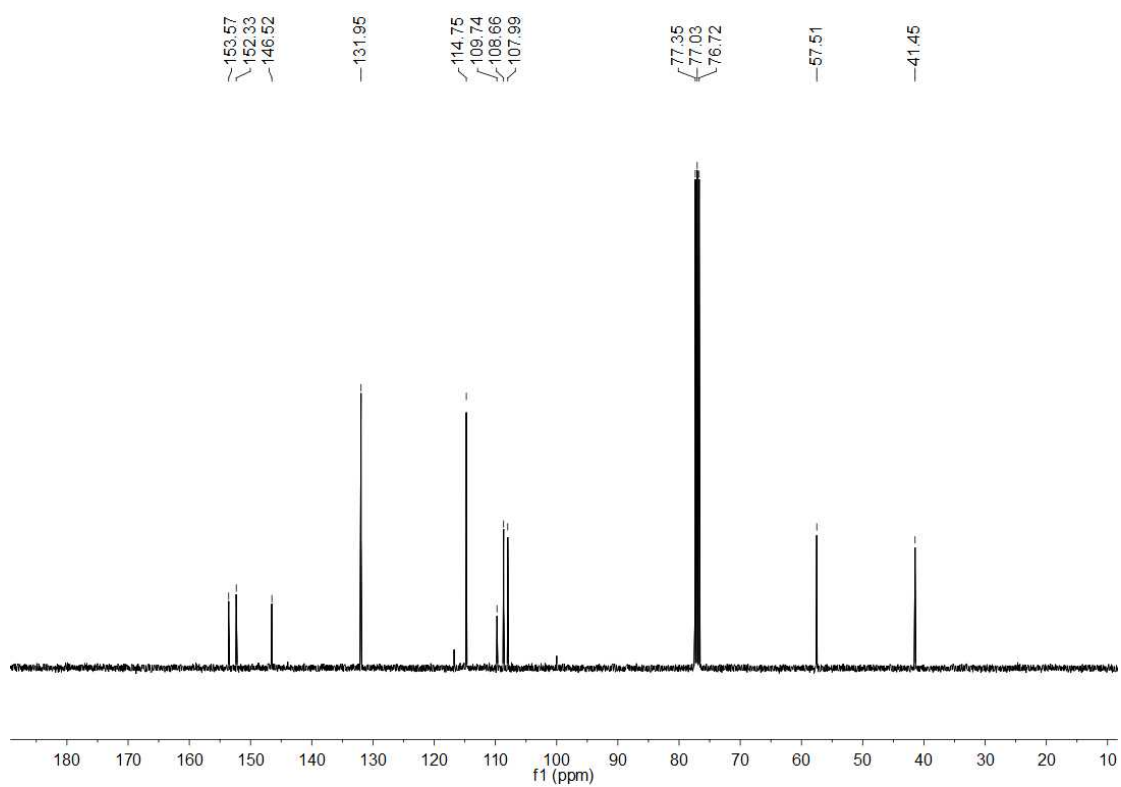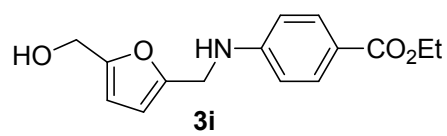

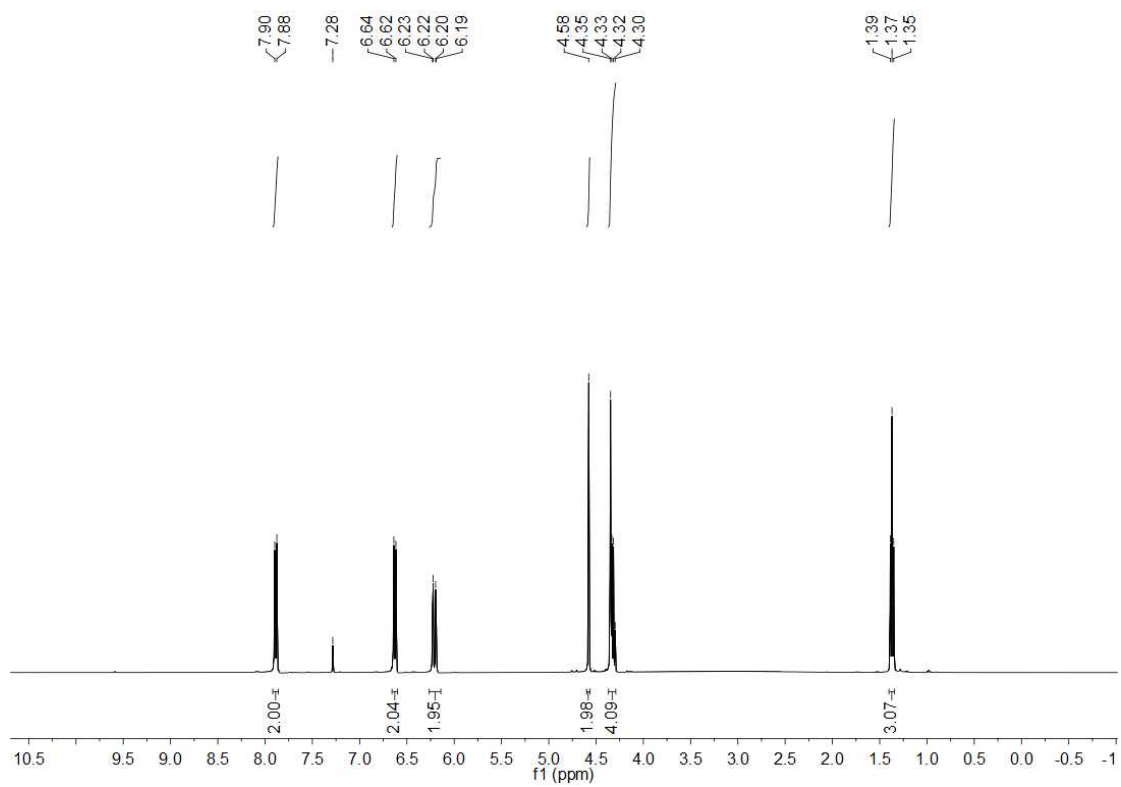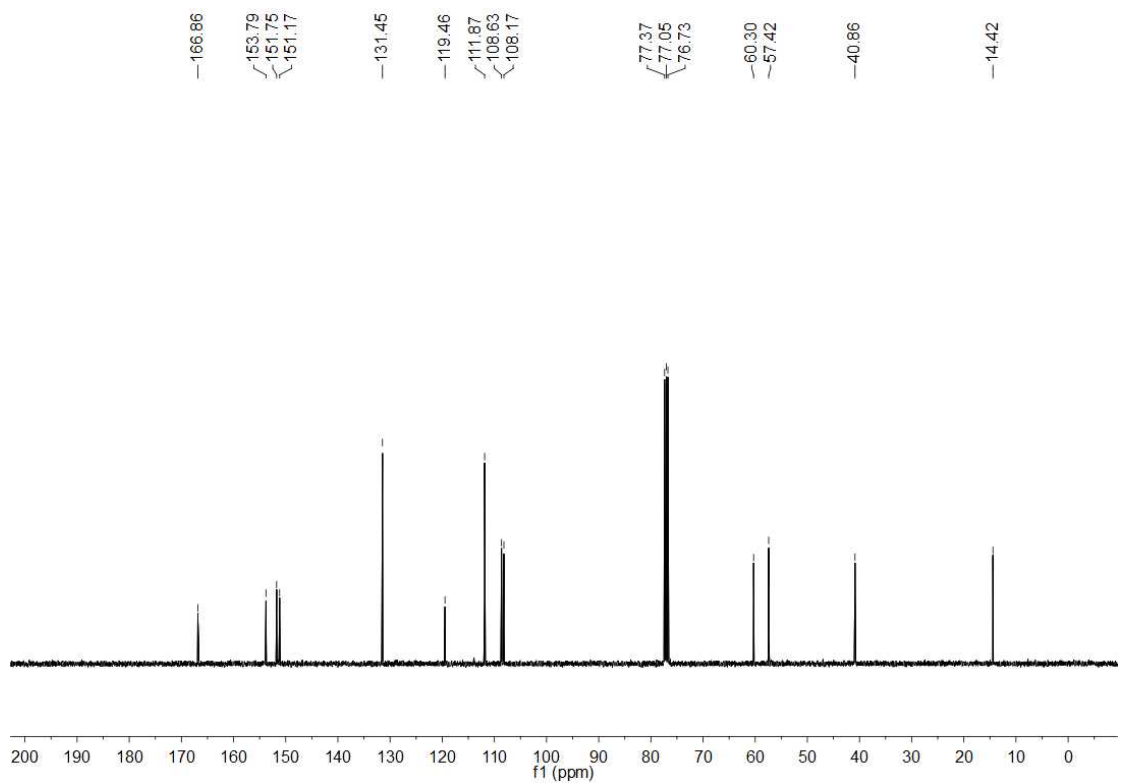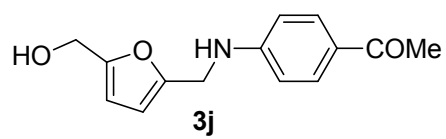

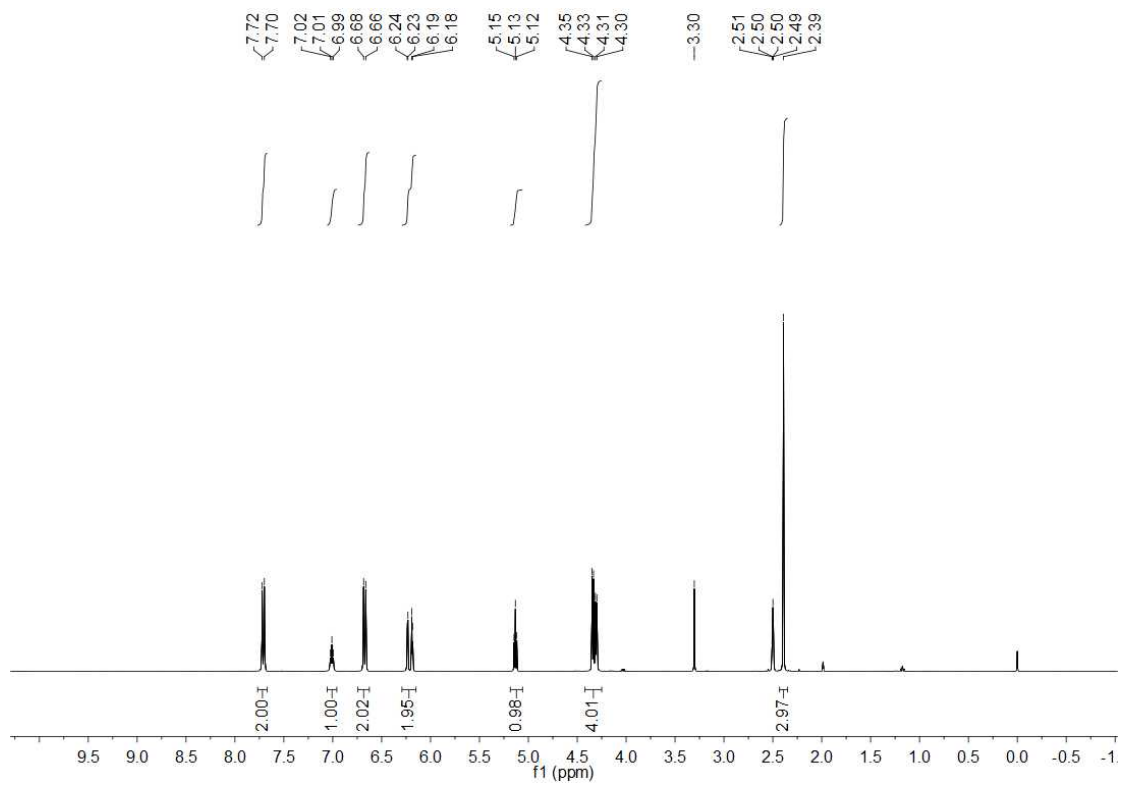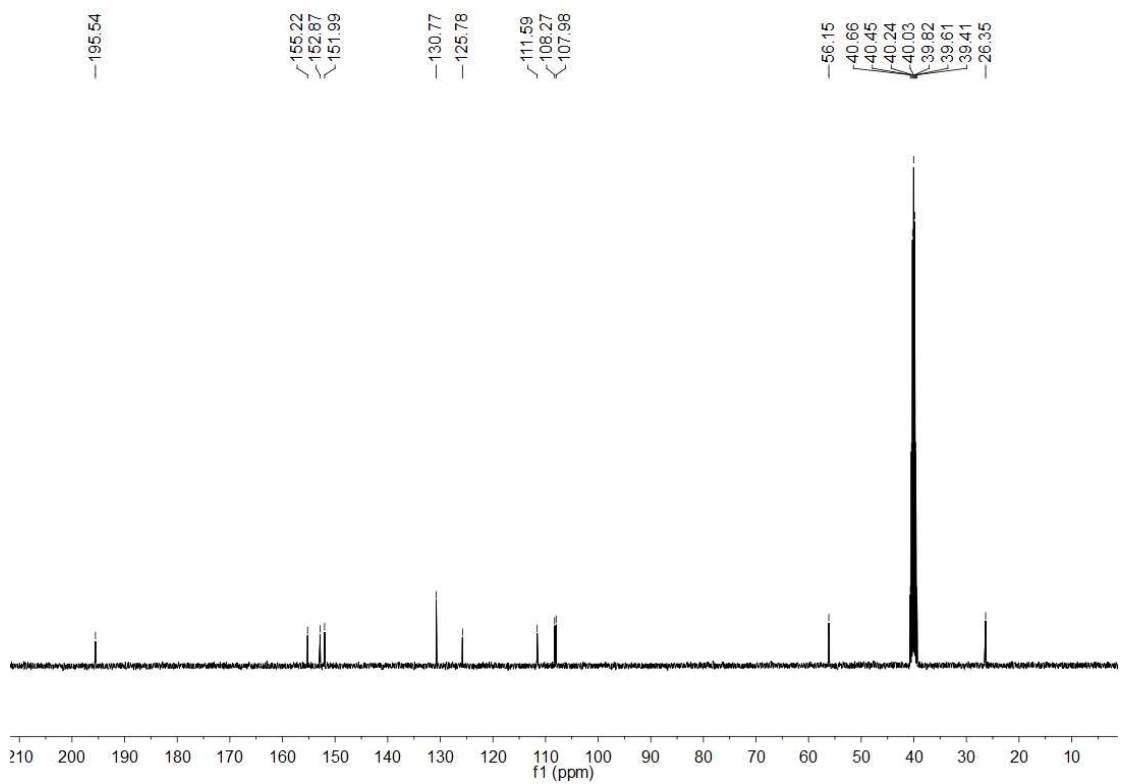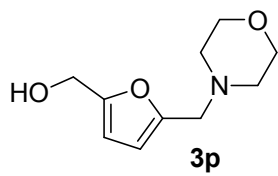



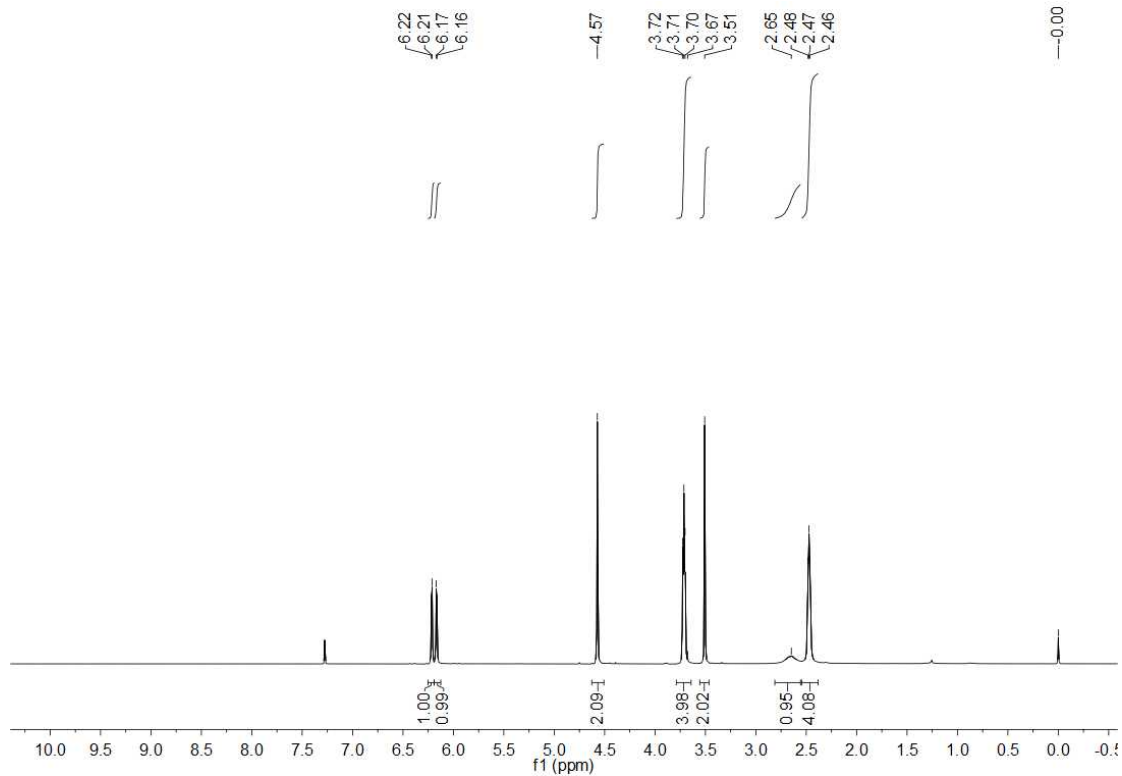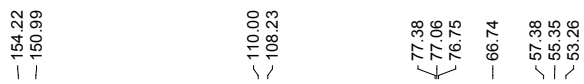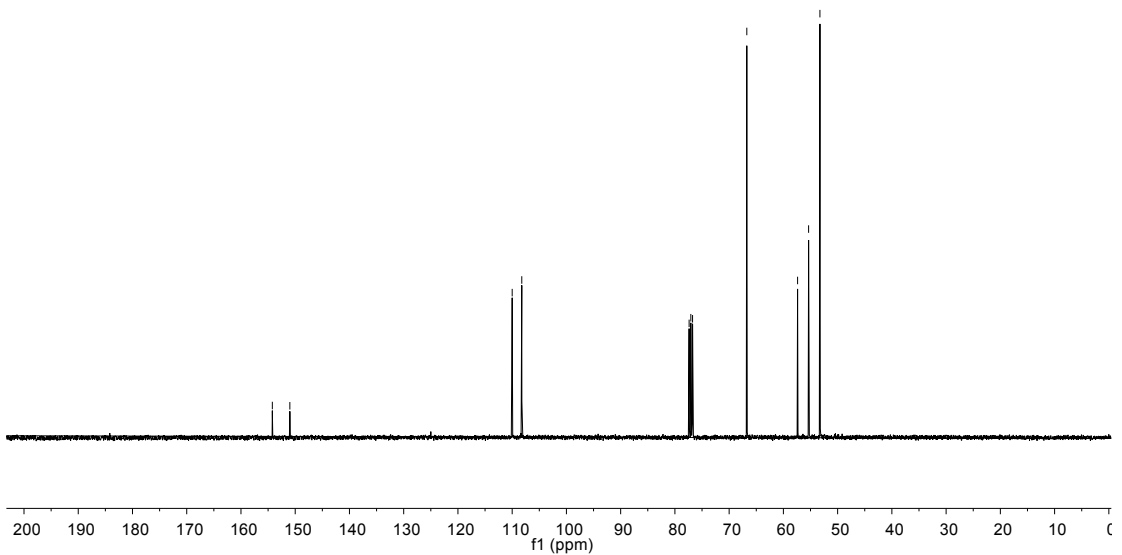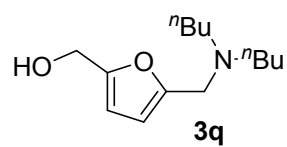

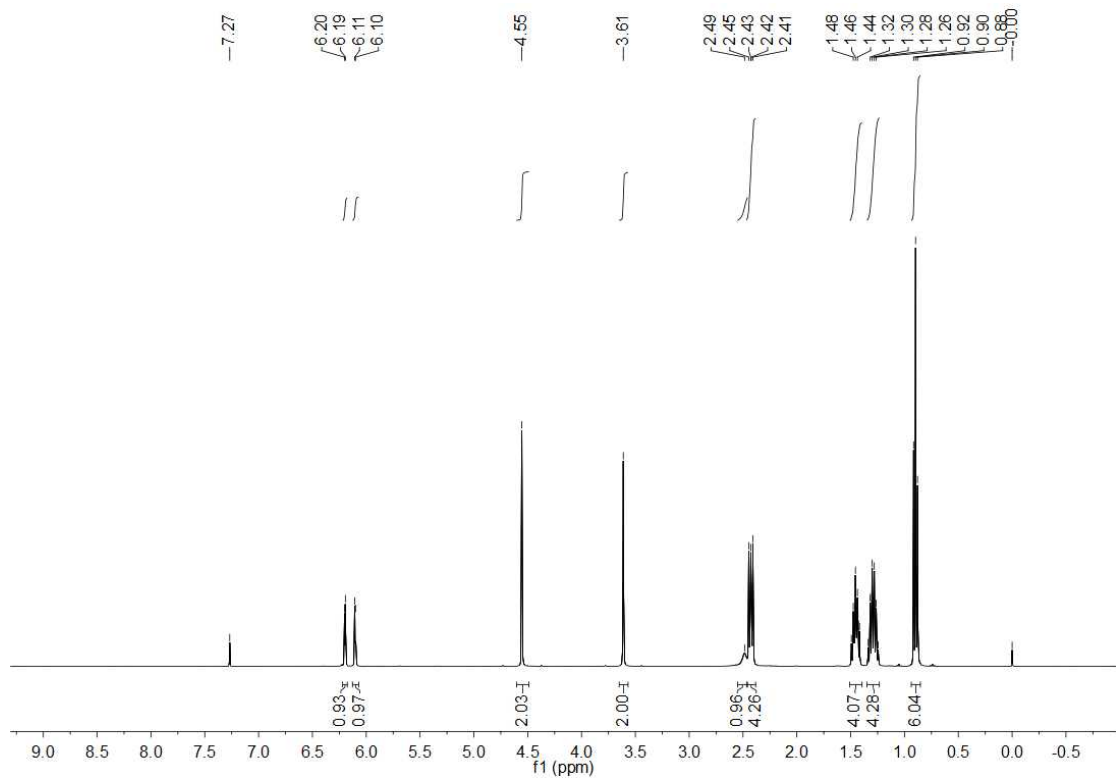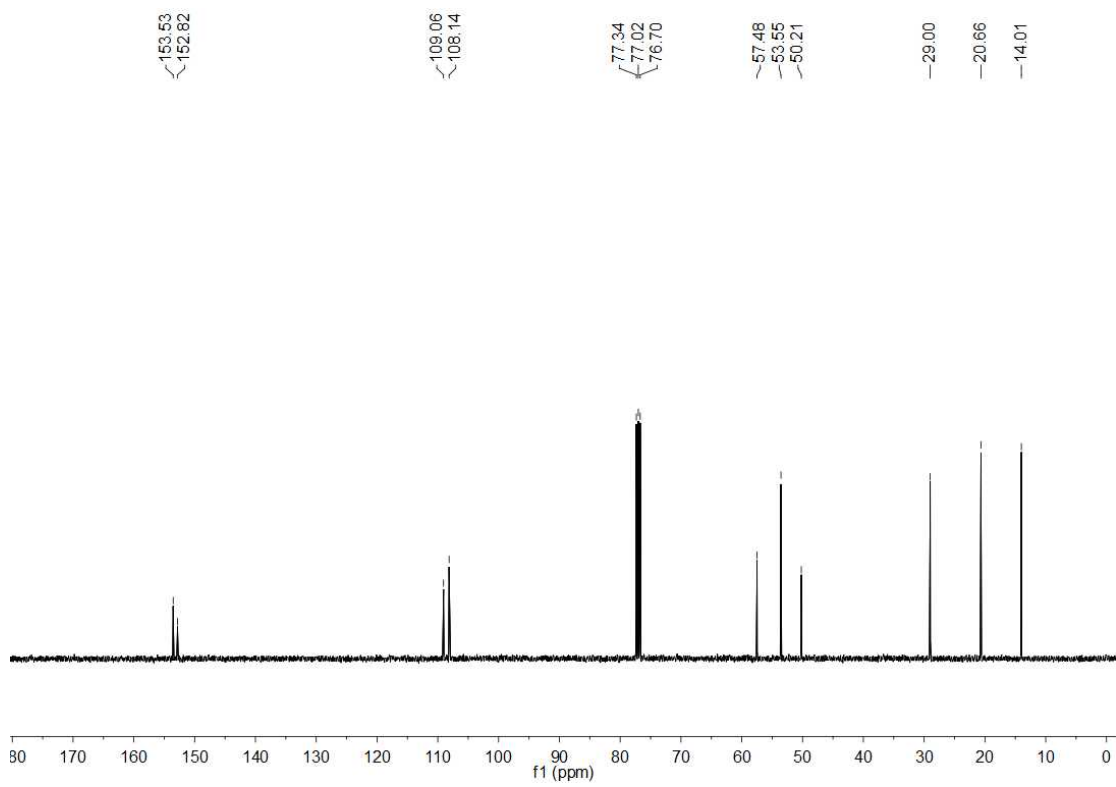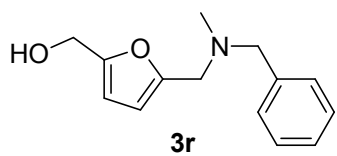

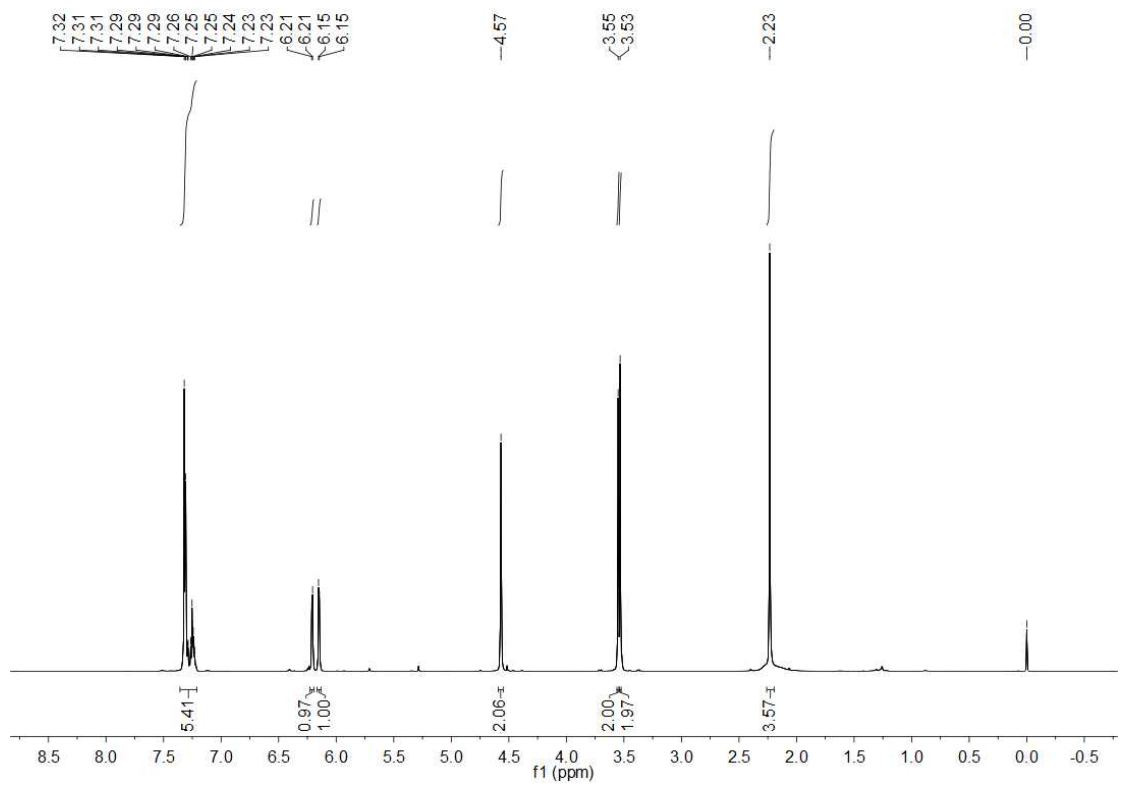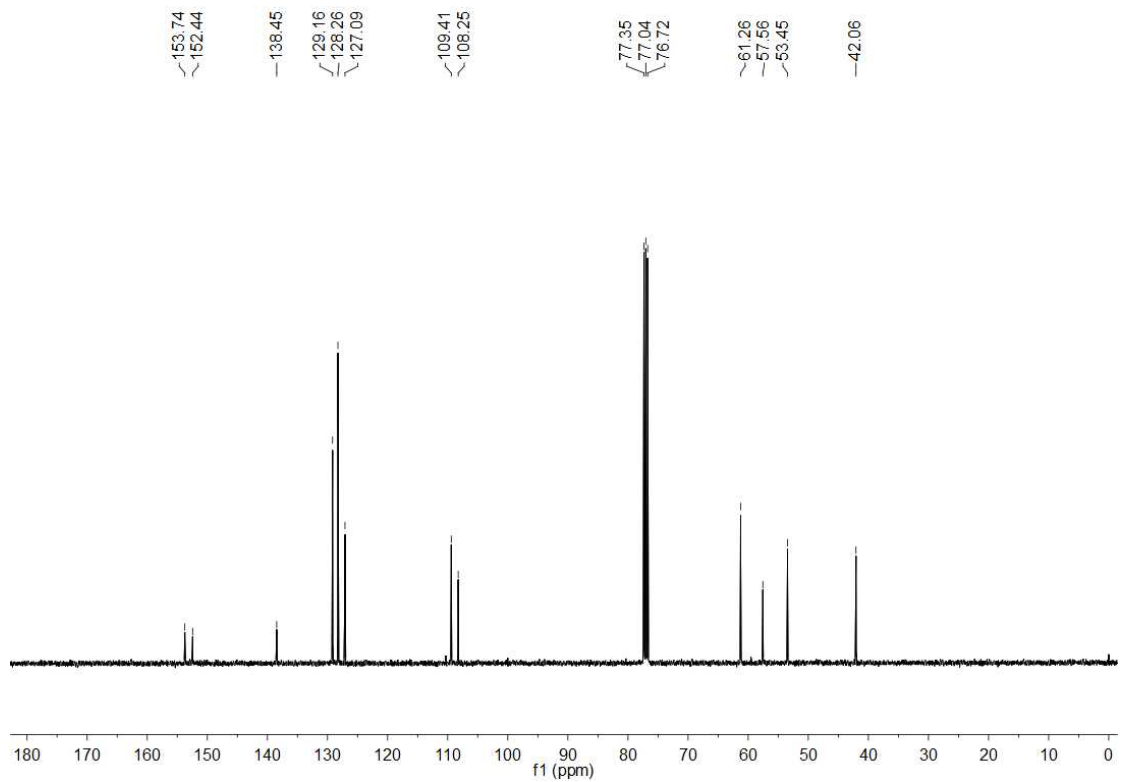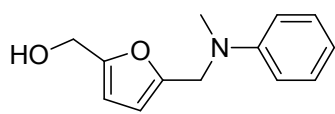

**3s**

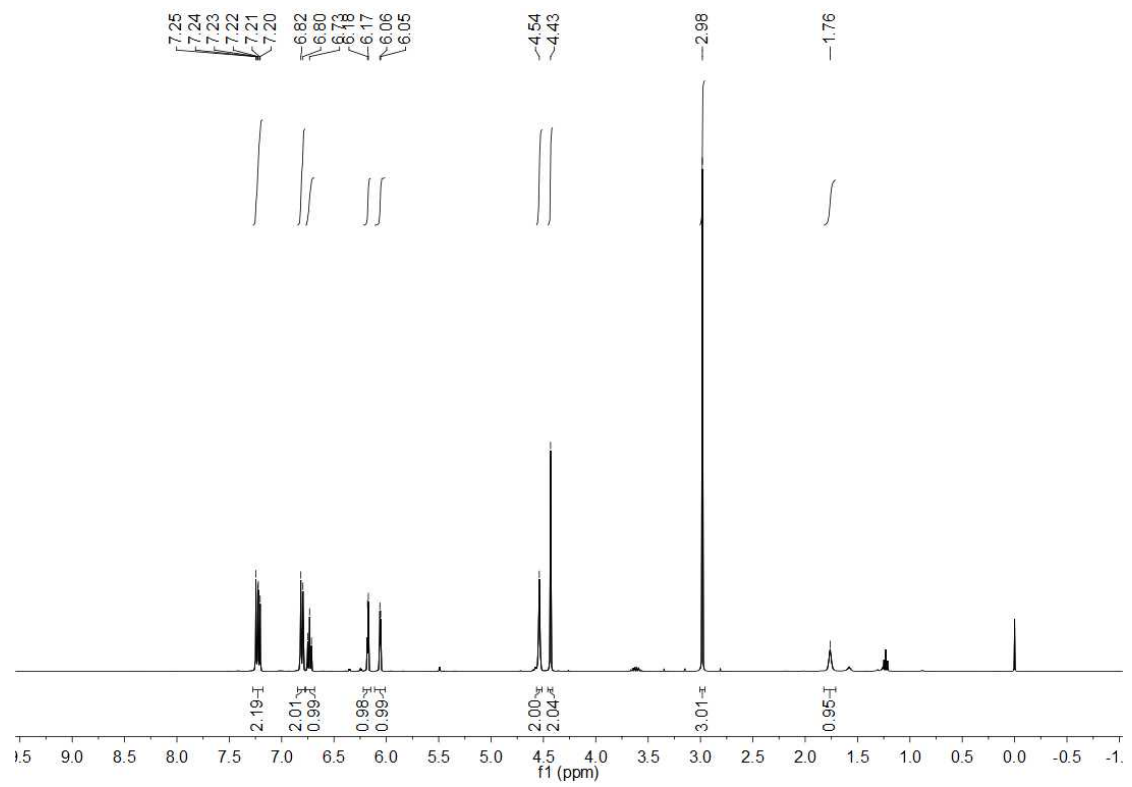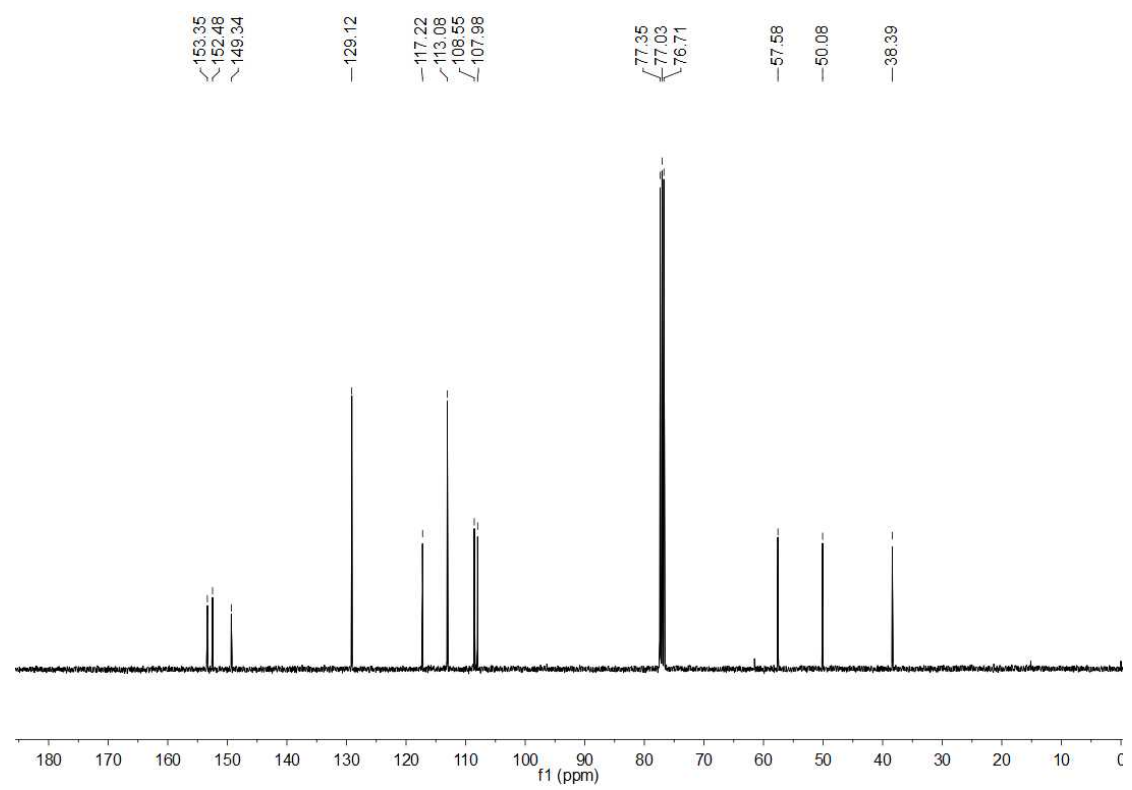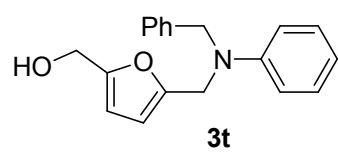

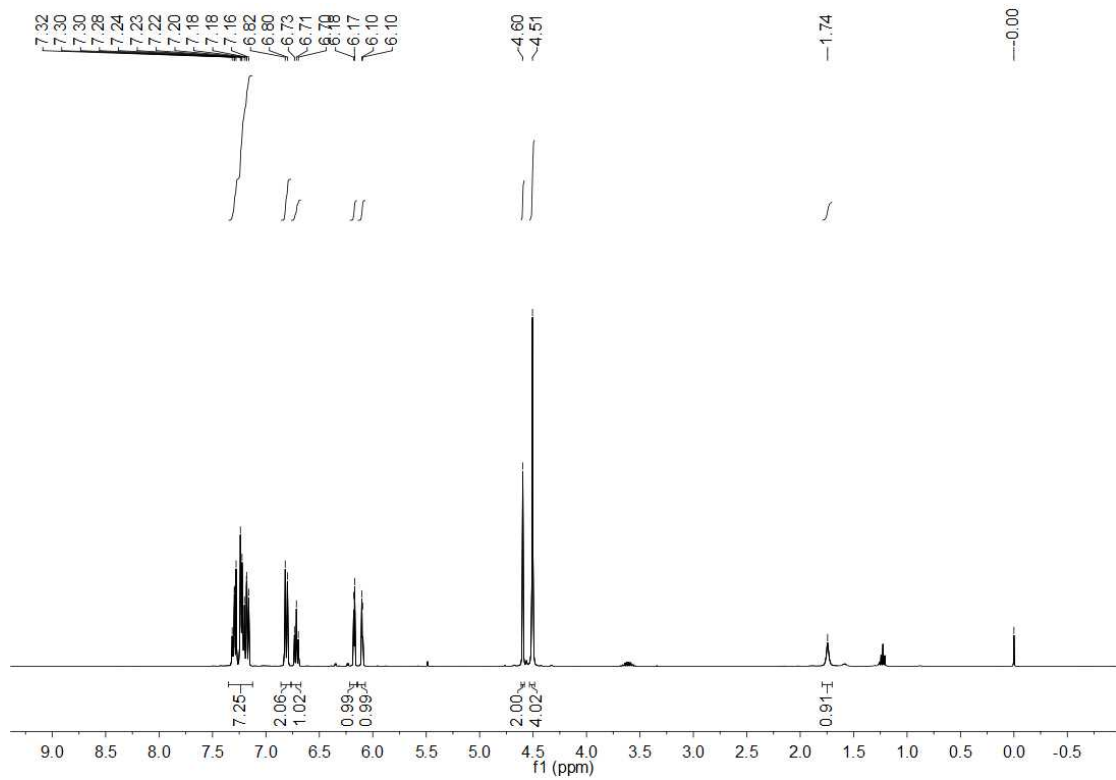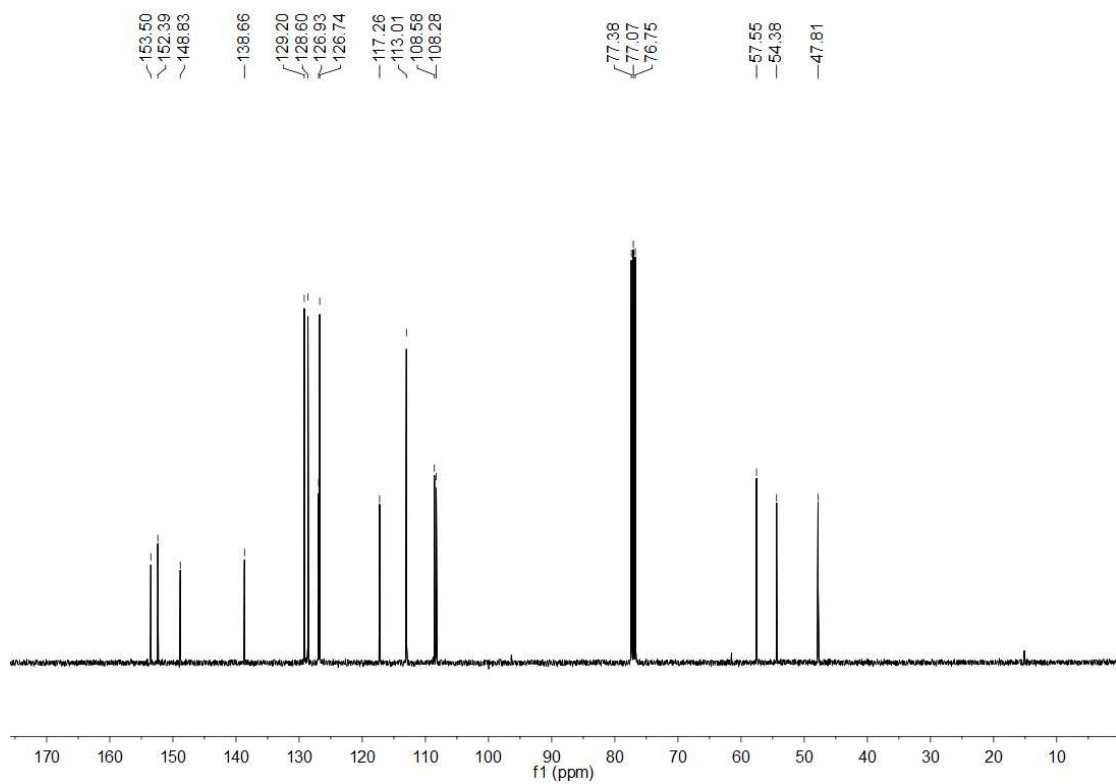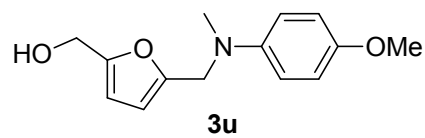

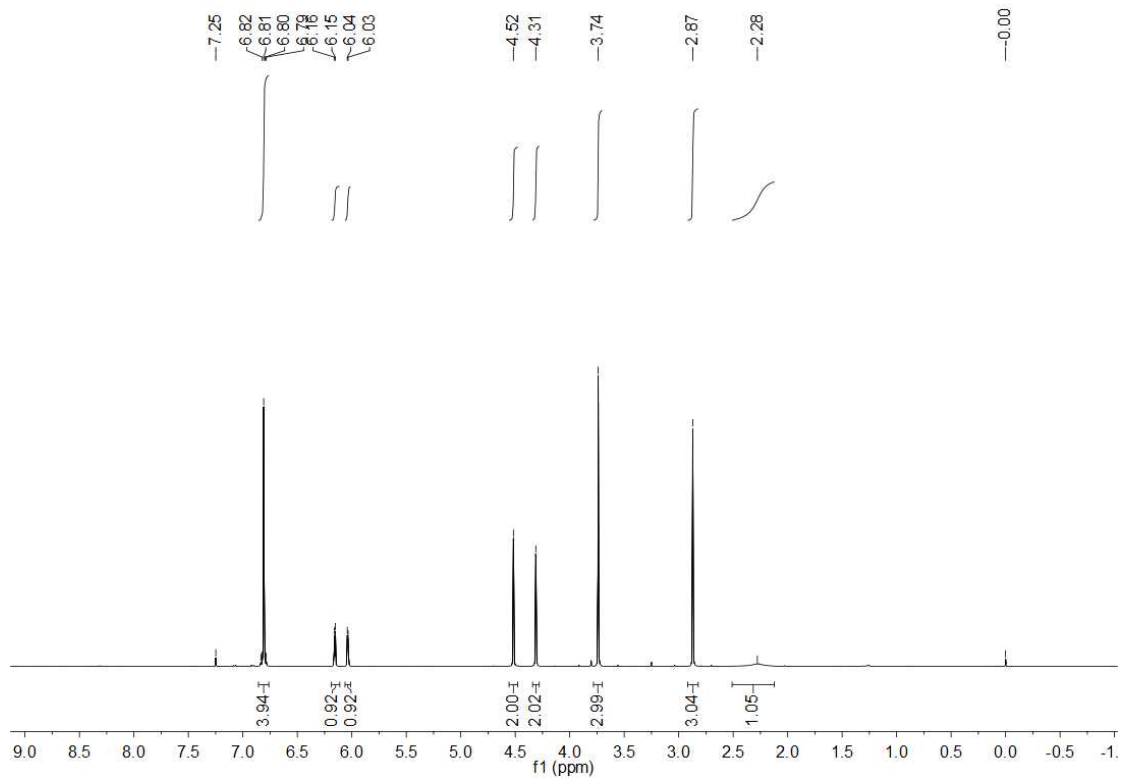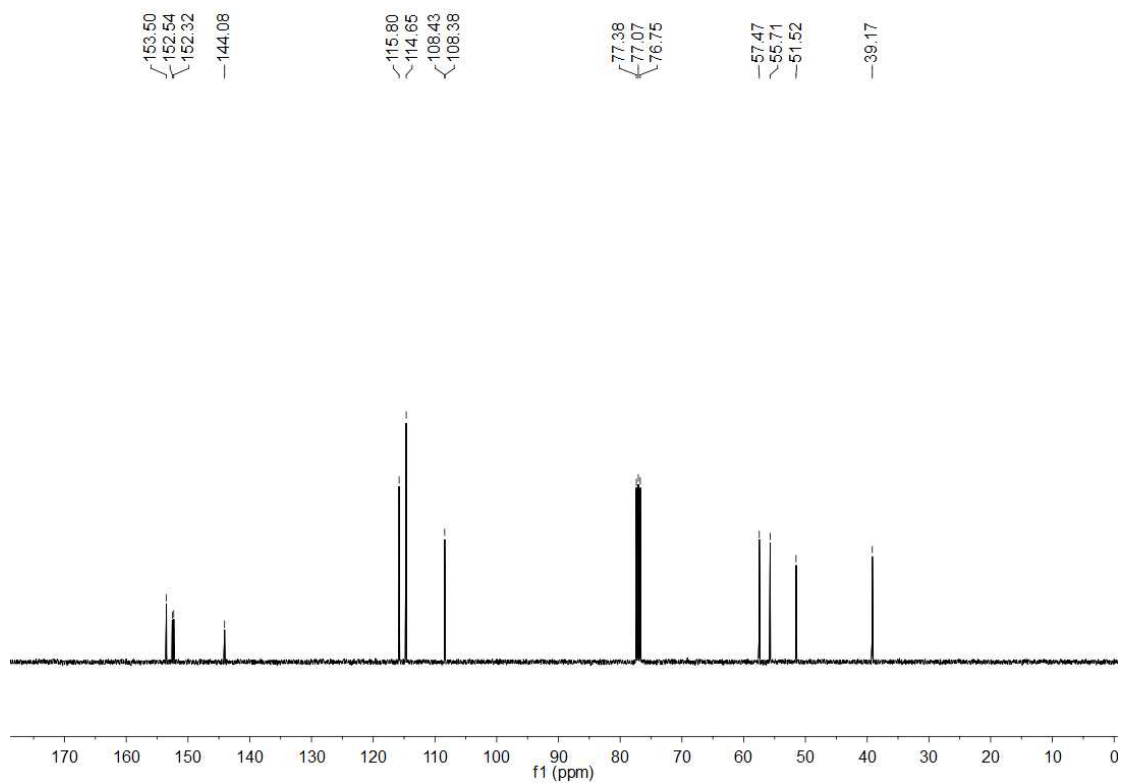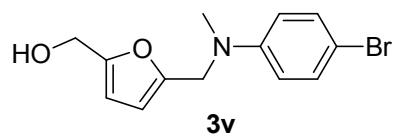

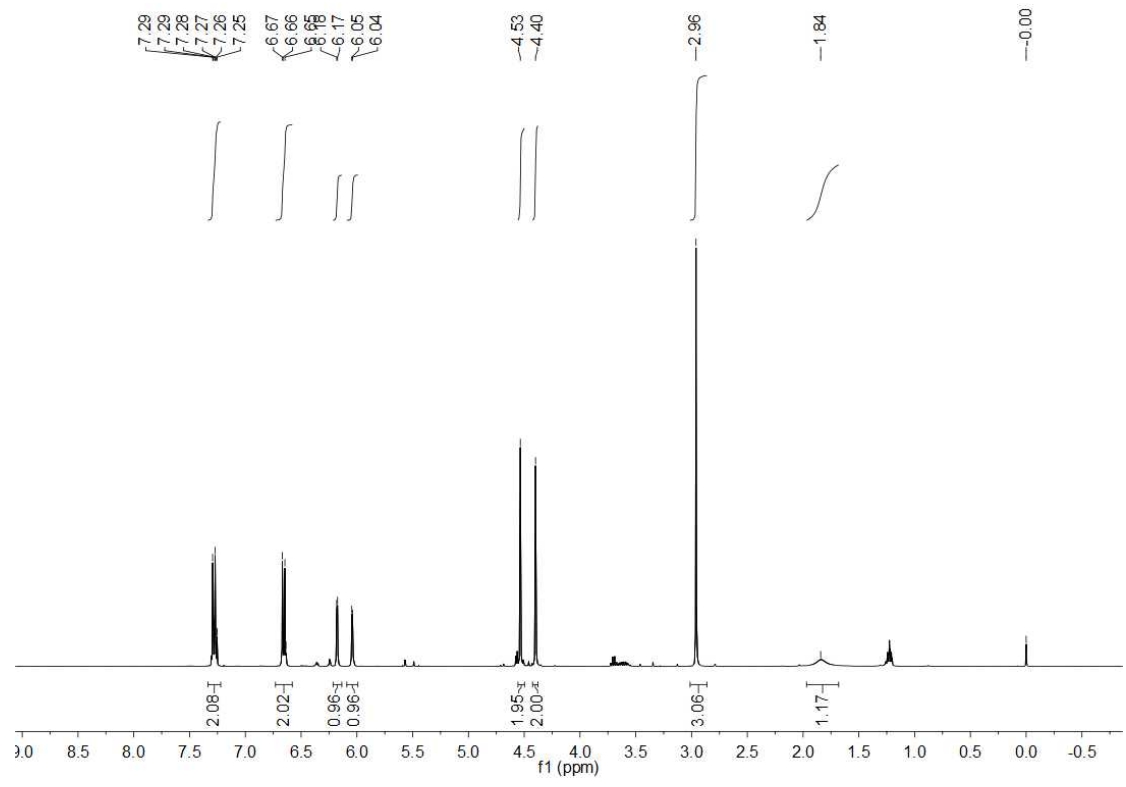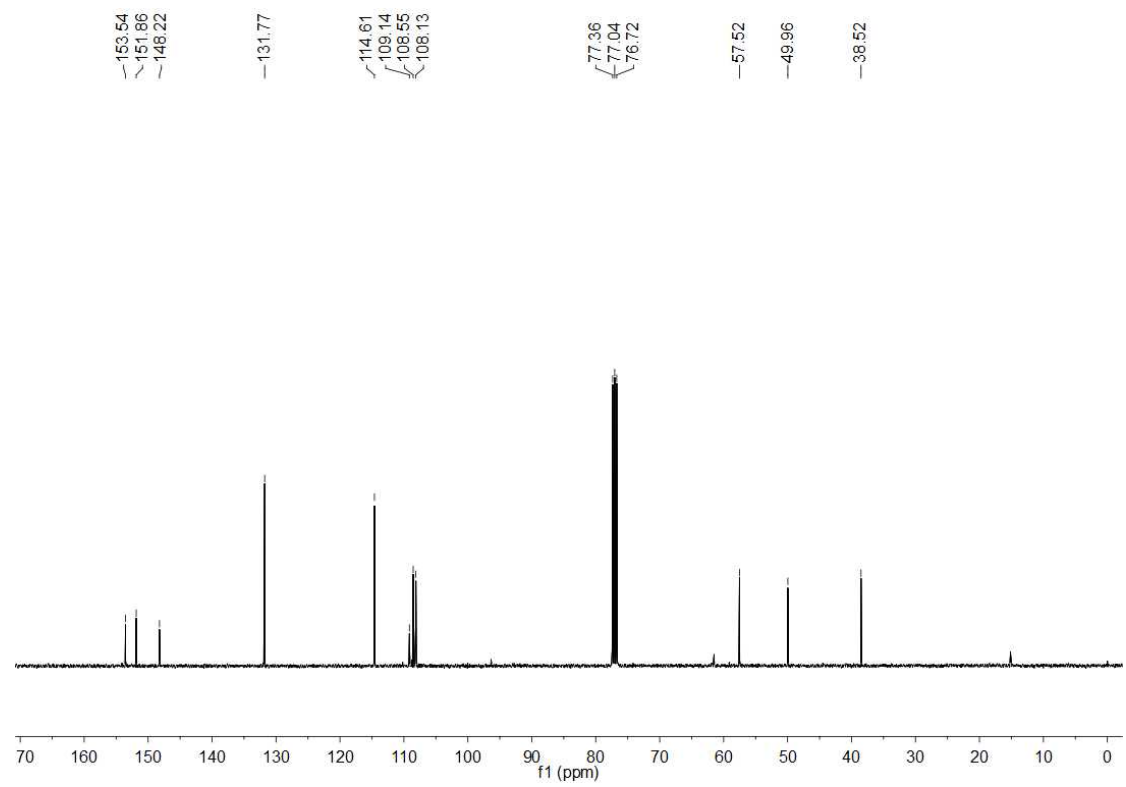

Supplement: c4ra10349a1.pdf [file c4ra10349a1.pdf]
